# Supplementary material
Source: PubMed Central journal article supplement (PMC3058384)
Supplement: NIHMS248195-supplement-1.pdf [file NIHMS248195-supplement-1.pdf]

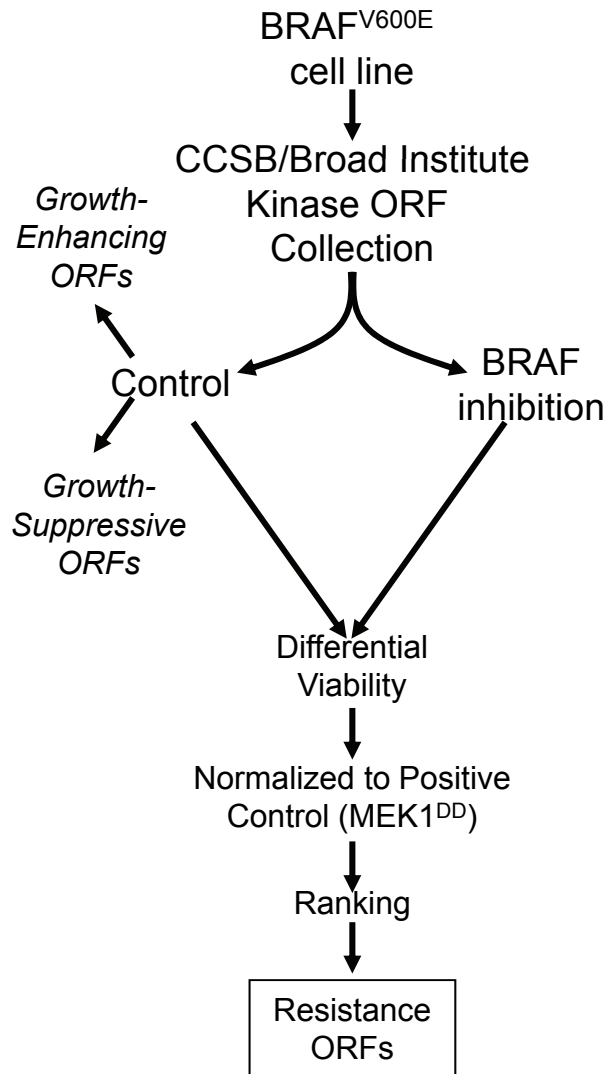

**Supplemental Fig.1:** Schematic outlining an ORF-based functional screen for kinases that drive resistance to B-RAF inhibition. The B-RAF<sup>V600E</sup> cell line A375 was lentivirally transduced with the 597 kinases in the CCSB/Broad Institute Kinase ORF Collection. ORFs having a positive or negative effect on proliferation in control-treated A375 were identified and removed from final analysis. Resistance-promoting ORFs were identified by generating a differential viability ratio between B-RAF inhibited (PLX4720-treated) and control-treated cells. Differential viability was normalized to a constitutively active MEK1 allele, MEK1<sup>DD</sup>; an assay specific positive control.

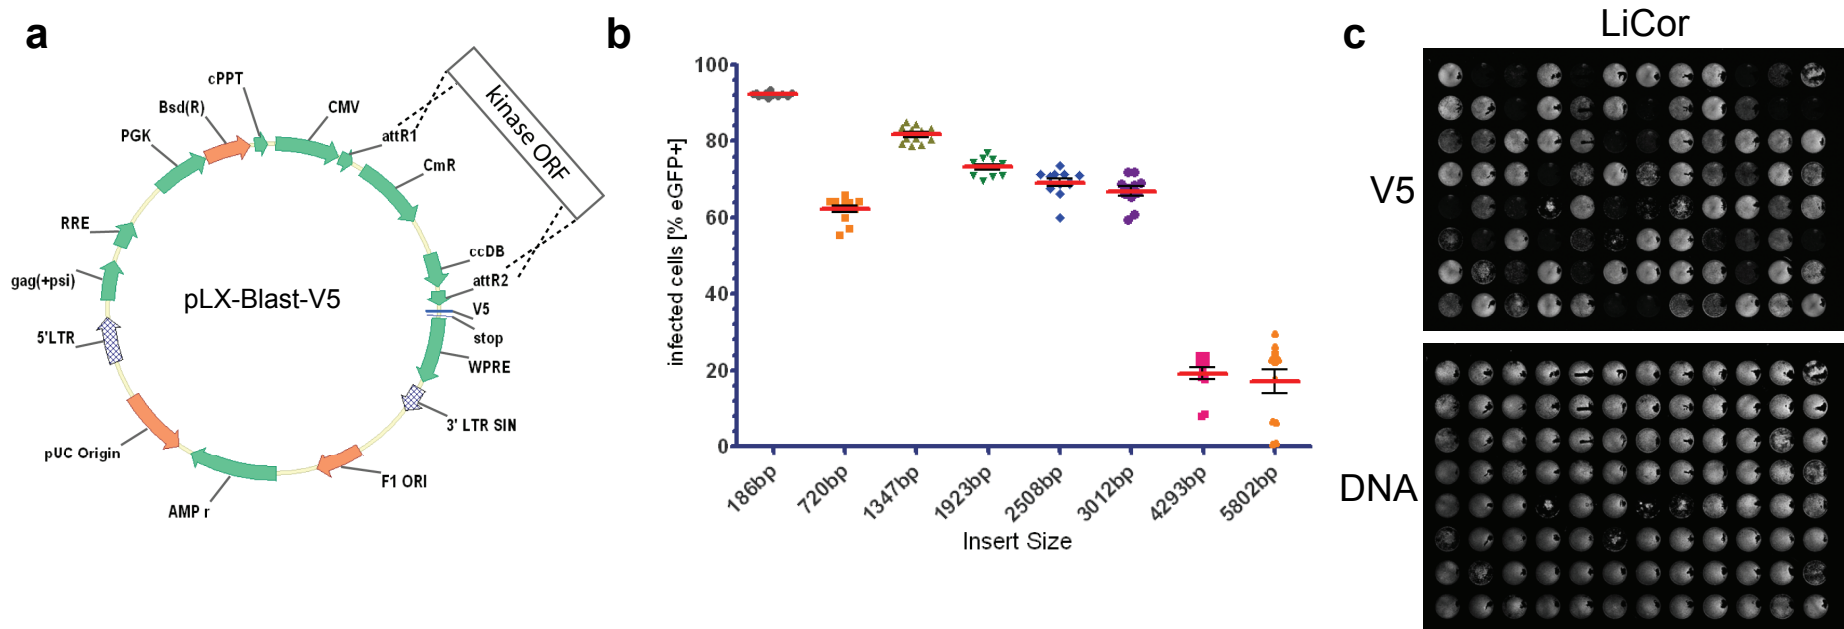

**Supplementary Fig. 2:** The CCSB/Broad Institute Kinase ORF Collection is well expressed via high titer lentivirus. (a), schematic of the pLX-BLAST-V5 lentiviral expression vector used for all ORF-screens and subsequent validation. (b) GFP-tagged ORFs representing a broad size range were lentivirally expressed in Jurkat cells and the percentage of GFP-expressing cells/ORF (e.g., infected cells) quantified, demonstrating high viral titer across a range of ORF sizes. (c), expression of 96 random ORFs detected via LiCor with antibodies against the V5-epitope tag, relative to cellular DNA. Expression was detectable in 83% of the wells.

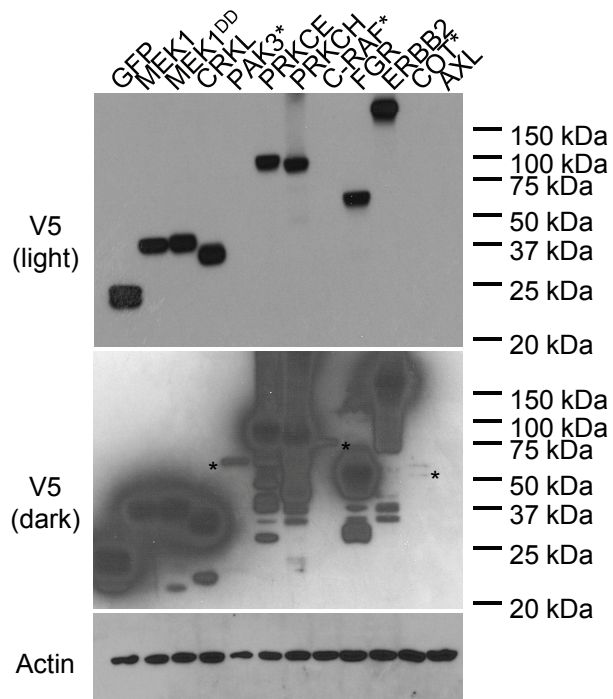

**Supplementary Fig. 3:** Expression of candidate resistance ORFs. 293T were transiently transfected with pLX-BLAST-V5-ORF (indicated) and expression detected using an anti-V5-HRP antibody. The AXL clone is 'closed' and has a stop codon preceding the V5 tag. See Supplementary Fig. 8 for verification of expression; (\*) on dark-exposure indicate the expression of three ORFs not visible in the lighter exposure.

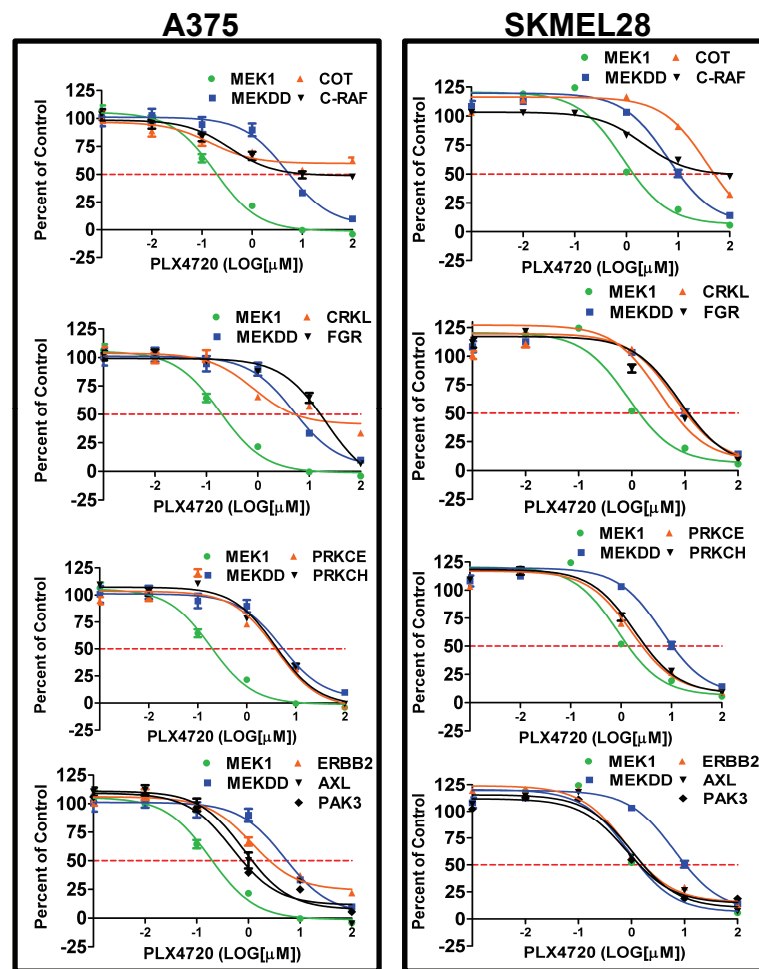

**Supplementary Fig. 4:** A secondary screen prioritizes the top 9 candidate B-RAF inhibitor resistance ORFs. The top nine ORFs scoring in the primary screen were expressed in A375 or SKMEL28 and a  $GI_{50}$  generated from an 8-point PLX4720 concentration range.

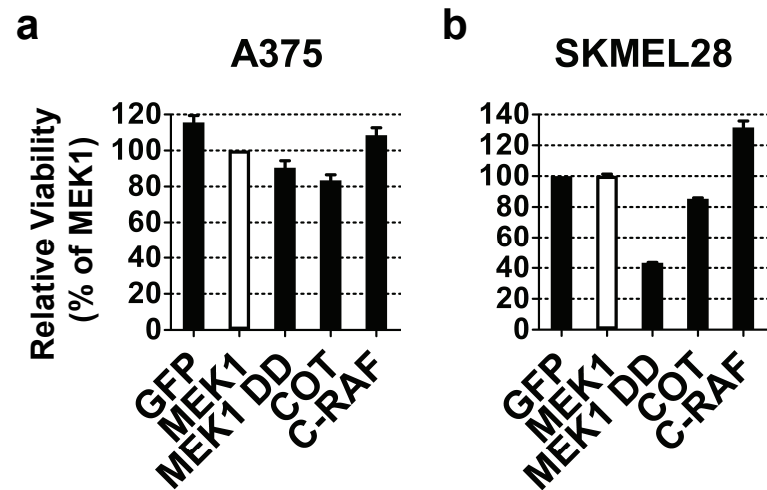

**Supplementary Fig. 5:** Effects of ORF expression on proliferation in B-RAF<sup>V600E</sup> cell lines. Proliferation, relative to MEK1, in (a) A375 or (b) SKMEL28 expressing indicated ORFs after 7 days of growth.

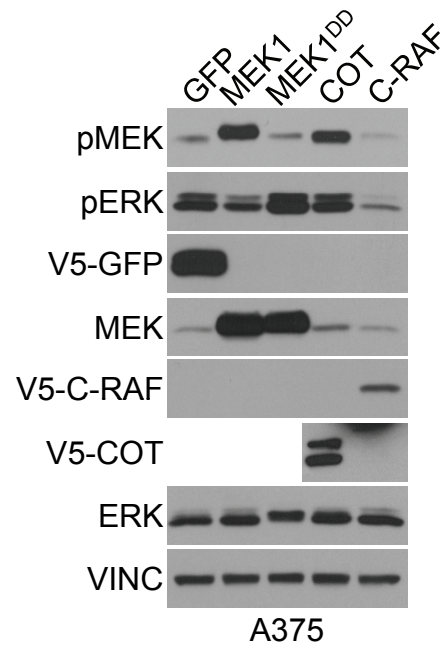

**Supplementary Fig. 6:** Ectopic expression of constitutively active MEK1 (MEK1<sup>DD</sup>) and COT lead to increased pMEK/pERK in A375, whereas C-RAF reduces pMEK/pERK levels. Lysates from A375 ectopically expressing GFP, MEK1, MEK<sup>DD</sup>, COT or C-RAF were analyzed via immunoblot for levels of pERK and pMEK. GFP and MEK1 (lanes 1-3) were separated from COT/C-RAF (lanes 4-5) to prevent residual V5-MEK1 signal from overwhelming that of COT and C-RAF, which are expressed at much lower levels.

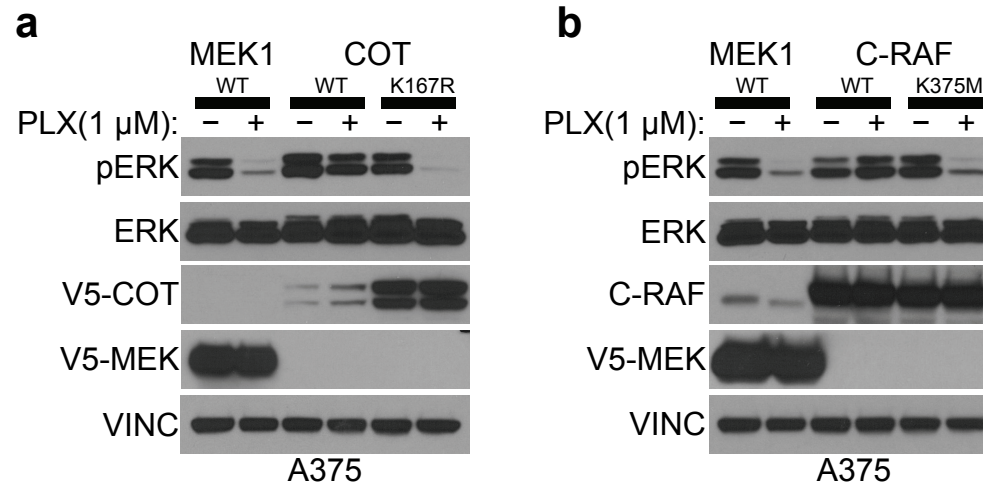

**Supplementary Fig. 7:** The kinase activity of COT and C-RAF is required for sustained ERK phosphorylation in the context of PLX4720 treatment. Immunoblot analysis of A375 expressing ectopic (a) MEK1, wild type COT or kinase inactive COT (COT<sup>K167R</sup>) or (b) MEK1, wild type C-RAF or kinase inactive C-RAF (C-RAF<sup>K375M</sup>) treated with 1  $\mu$ M PLX4720 for 18 h.

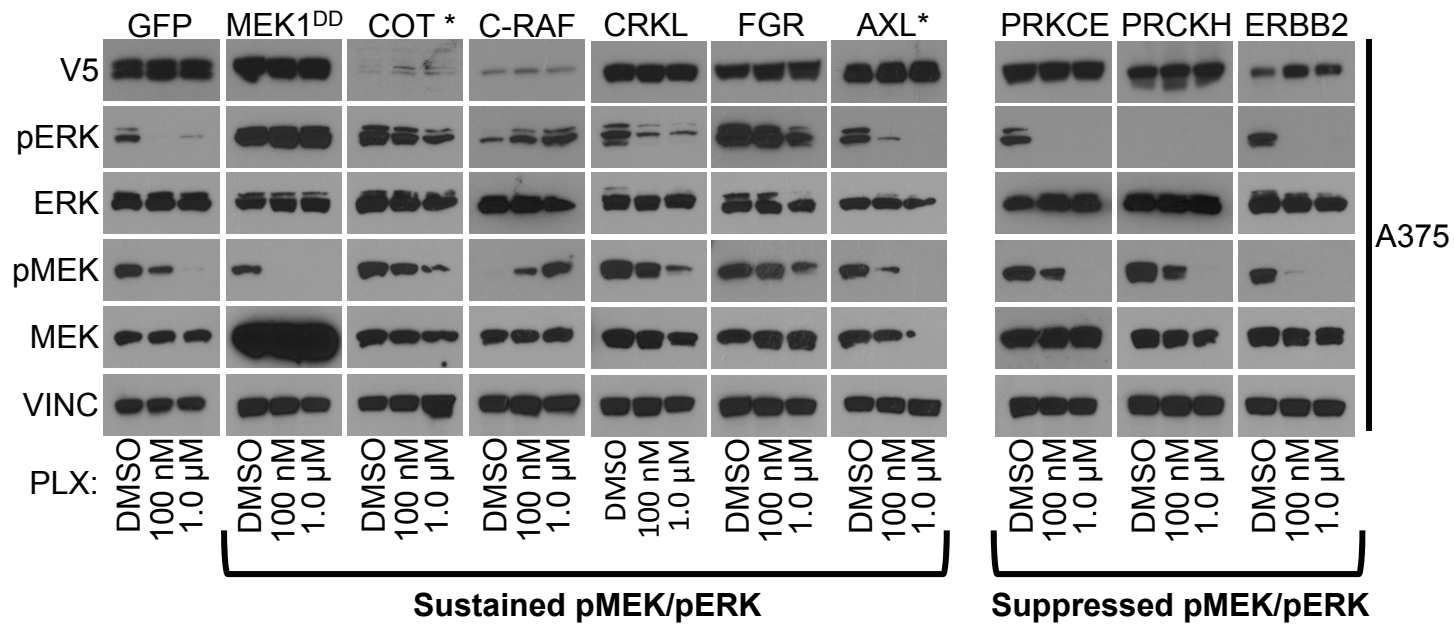

**Supplementary Fig. 8:** Effects of ORF expression on MAPK signaling in the context of the B-RAF inhibitor PLX4720. MAPK pathway activation was assessed by immunoblot analysis of pERK and pMEK in A375 expressing the indicated ORFs in the presence of PLX4720 (18 h., concentration indicated). (\*) indicates the use of an antibody directed against the expressed ORF, not the V5 epitope. AXL was cloned without the V5 tag.



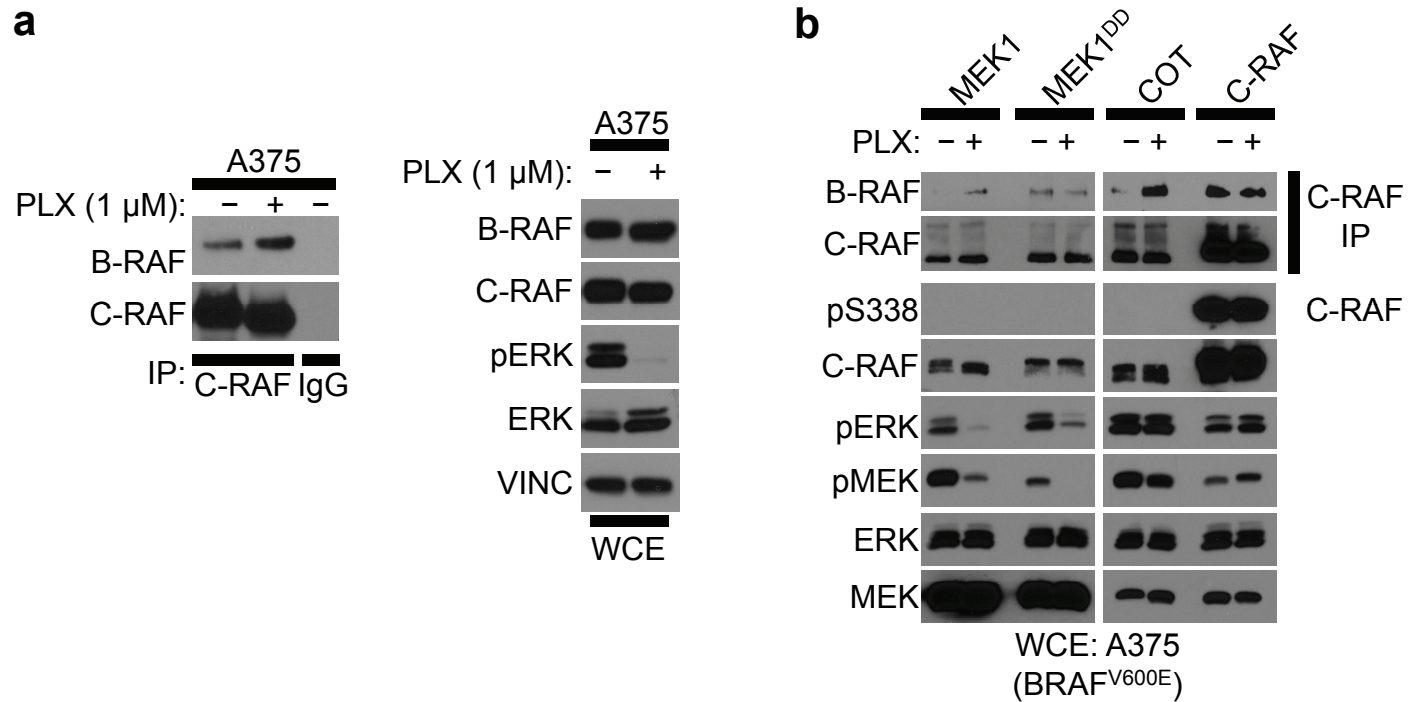

**Supplementary Fig. 9:** B-RAF associates with immunoprecipitated C-RAF in A375 following 18 hr. treatment with 1  $\mu$ M PLX4720 (+) or DMSO (-)(a). WCE; whole cell extract controls. Ectopically expressed C-RAF constitutively associates with B-RAF and is phosphorylated at S338, consistent with membrane localization and activation. MEK1, MEK<sup>DD</sup> and COT-expressing A375 show no evidence of C-RAF activation, (b).

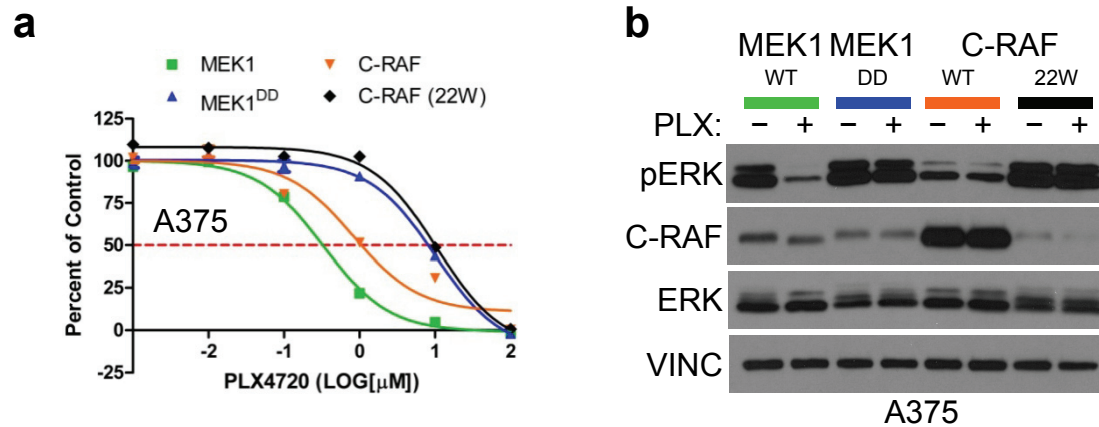

**Supplementary Fig. 10:** Retroviral expression of a wild-type C-RAF or a high-activity truncation mutant of C-RAF (C-RAF(22W)) renders A375 resistant to the B-RAF inhibitor PLX4720 (a) and leads to sustained pERK levels in the context of PLX4720 treatment (1  $\mu$ M, 18 h.), (b). C-RAF expression levels achieved with retroviruses are significantly lower than with lentiviral-based systems, resulting in a lower  $GI_{50}$  than that achieved with lentiviral C-RAF.

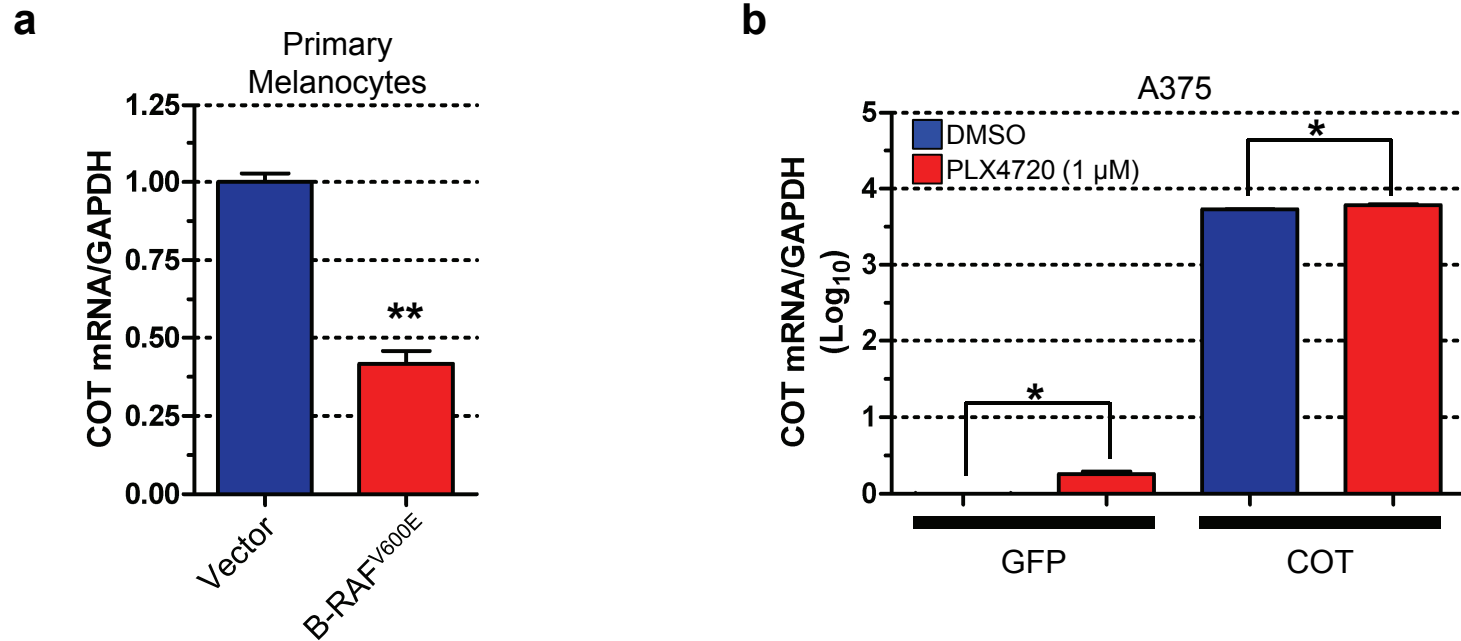

**Supplementary Fig. 11:** Effects of B-RAF<sup>V600E</sup> on COT mRNA (a) Quantitative RT/PCR of COT mRNA expression relative to GAPDH mRNA expression in transformed primary melanocytes expressing wild-type B-RAF (vector) or B-RAF<sup>V600E</sup>. COT expression was normalized to that of vector-expressing primary melanocytes. (\*\*) Significant,  $p < 0.05$  (Student's two-tailed, paired T-Test). (b) Endogenous COT mRNA is undetectable in PLX4720-sensitive A375 and ectopically expressed COT mRNA levels are unaffected by 1  $\mu\text{M}$  PLX4720 treatment. A375 expressing GFP or COT were treated for 18 h. with 1  $\mu\text{M}$  PLX4720. Reverse-transcribed mRNA was analyzed for GAPDH-normalized COT expression, relative to GFP-expressing, DMSO treated, A375. (\*) Not significant,  $p > 0.05$  (Student's two-tailed, paired T-Test). Error bars represent SEM.

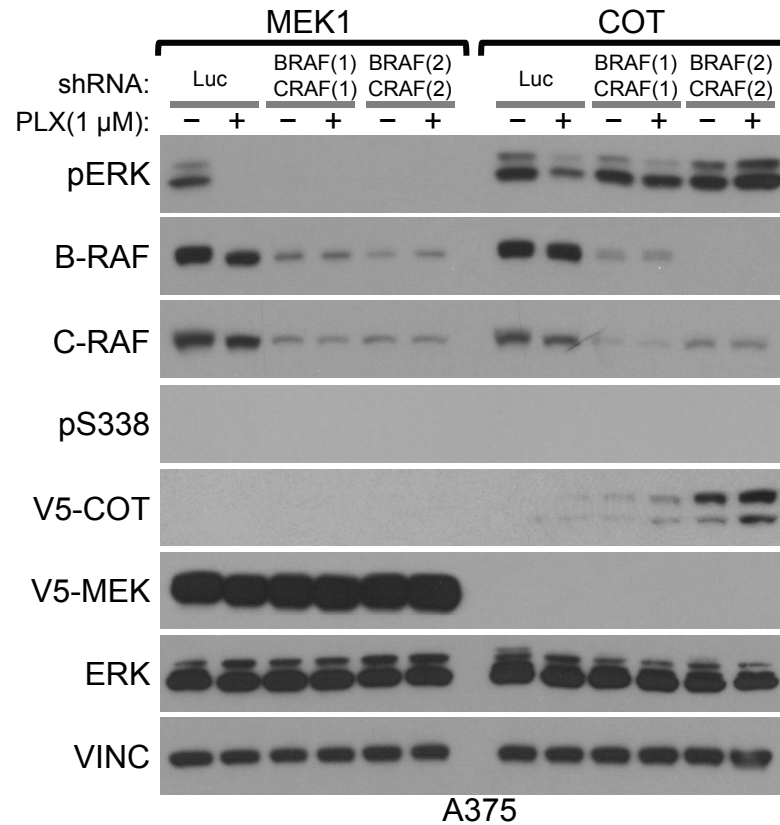

**Supplementary Fig. 12:** B- and C-RAF protein levels are not required for COT-mediated ERK phosphorylation. A375 expressing ectopic MEK1 (control) or COT were sequentially infected with lentivirus expressing shRNAs targeting B-RAF, C-RAF or control shRNA (shLuc) and assayed for expression of the indicated proteins in the presence (+) or absence (-) of 1  $\mu$ M PLX4720, 18 h.

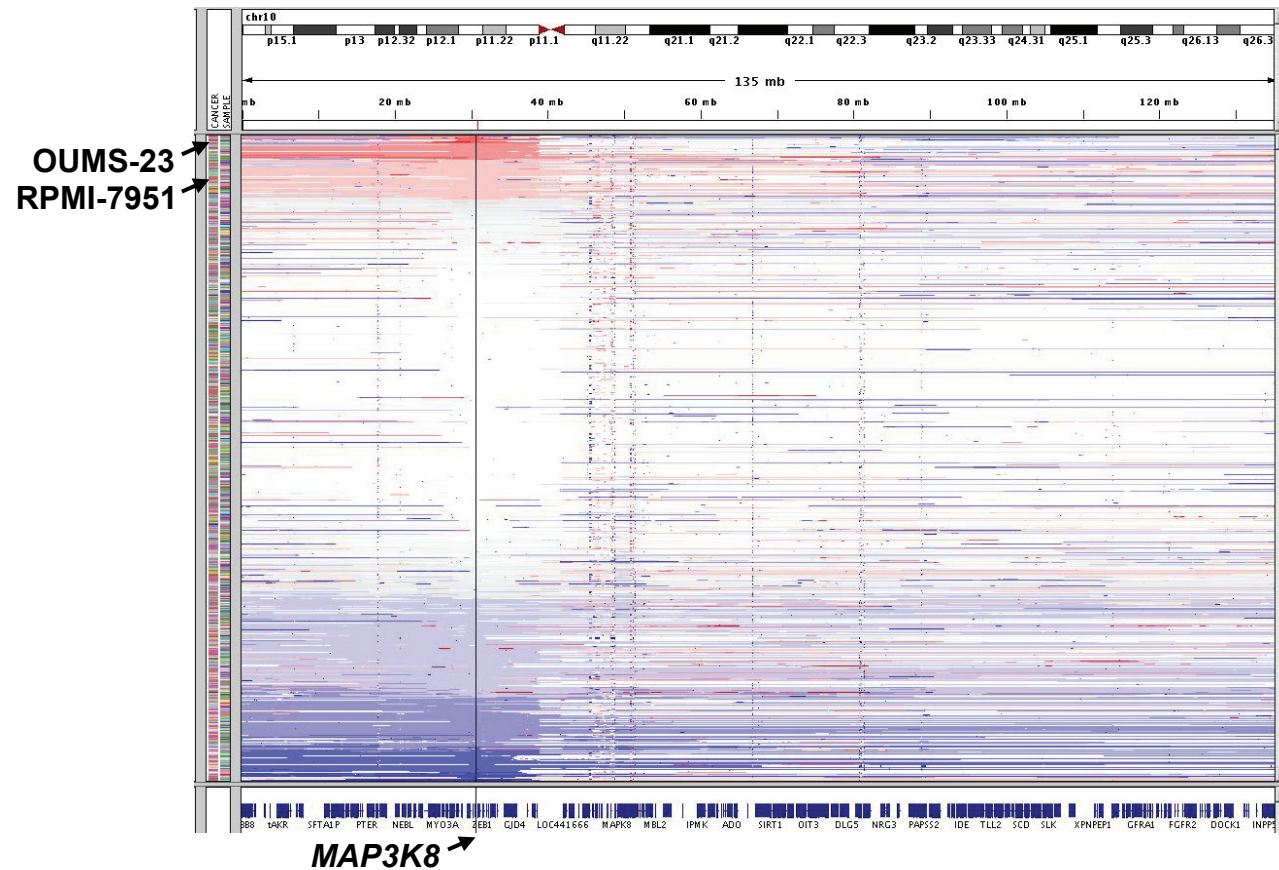

**Supplementary Fig. 13:** SNP analysis of 752 cell lines reveals copy number alterations in *MAP3K8/COT*. Of the 752 cell lines that had undergone copy number analysis, 534 had also undergone mutation profiling. Thirty-eight (7.1%) of mutation-profiled cells harbor the B-RAF<sup>V600E</sup> mutation. Two cell lines (OUMS-23, RPMI-7951, indicated) harbor the B-RAF<sup>V600E</sup> mutation along with copy number gain in *MAP3K8/COT*.

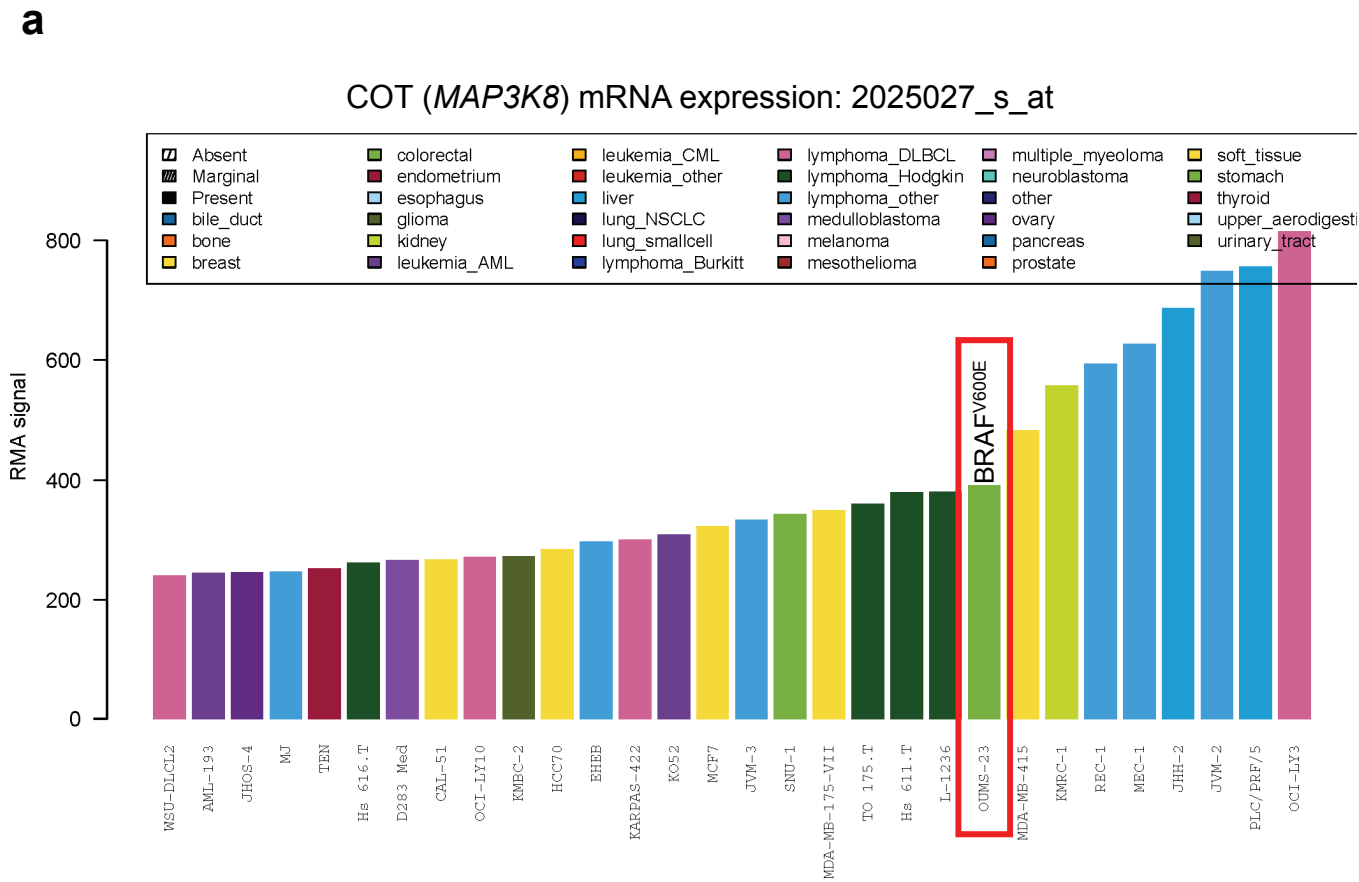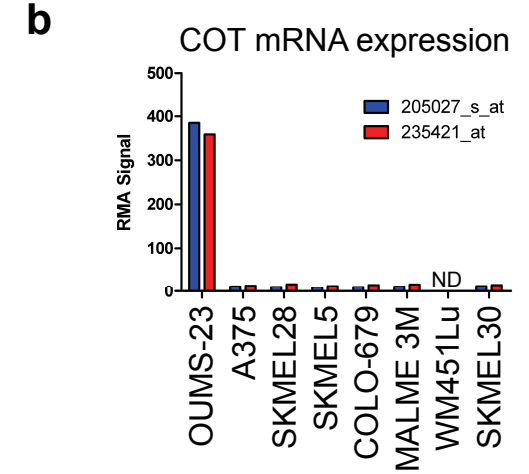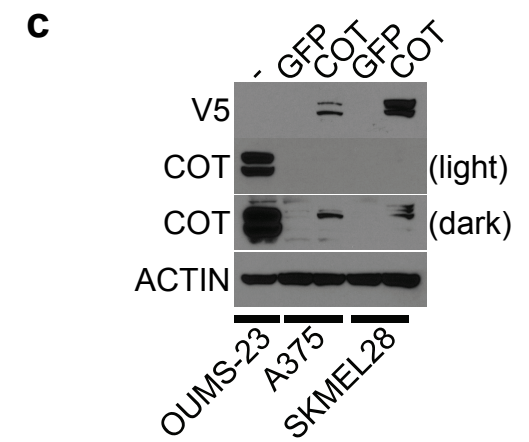

**Supplementary Fig. 14: MAP3K8/COT alterations in the cancer cell line OUMS-23.** (a) RMA signal of a *MAP3K8* /COT probe (noted) from mRNA microarray analysis. OUMS-23 is one of the top 2% (of 765 cell lines) expressing COT mRNA. (b) COT mRNA expression in a panel of B-RAF<sup>V600E</sup>-mutant cell lines. (c) Endogenous COT protein expression in OUMS-23 relative to ectopically expressed COT in A375 and SKMEL28 cell lines, as determined via immunoblot analysis of the indicated cells.

**a**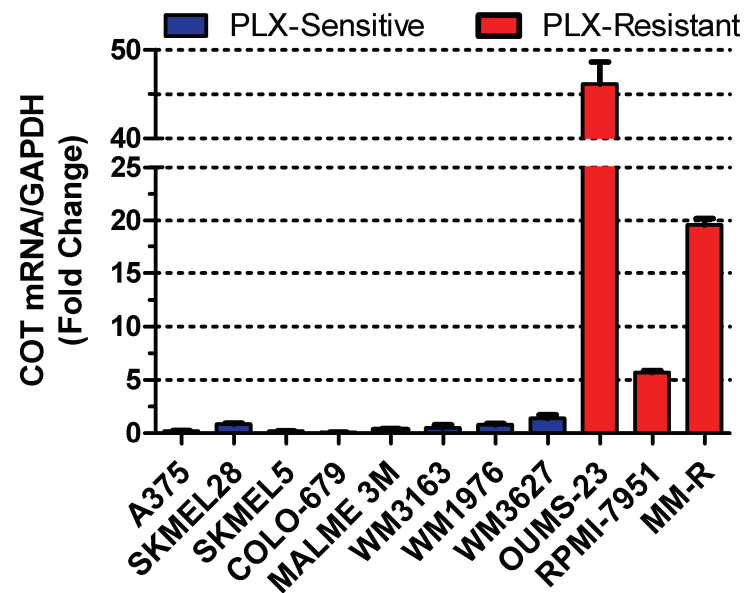**b**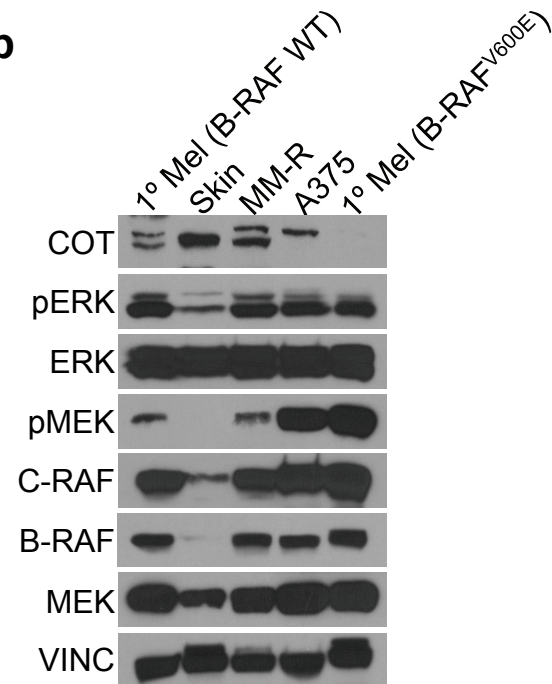

**Supplementary Fig. 15:** COT mRNA and protein are expressed in B-RAF-inhibitor resistant cell lines and tissue. (a) RT/PCR analysis of GAPDH-normalized COT mRNA expression in a panel of cell lines, short term cultures and tissue from relapsed, PLX4032-treated, malignant melanoma (MM-R). Corresponding protein expression for cell lines and short term cultures are shown in main Figure 3b and 3c, respectively. (b) Western blot analysis of lysates from primary melanocytes (1° Mel(B-RAF WT)), patient matched normal skin (Skin) and metastatic malignant melanoma (MM-R; COT mRNA shown in panel a), A375 cells and primary melanocytes expressing B-RAF<sup>V600E</sup>(1° Mel (B-RAF<sup>V600E</sup>)).

**a**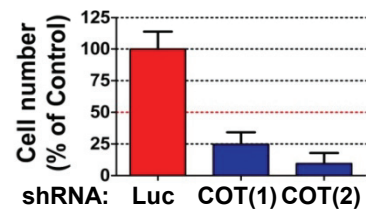**b**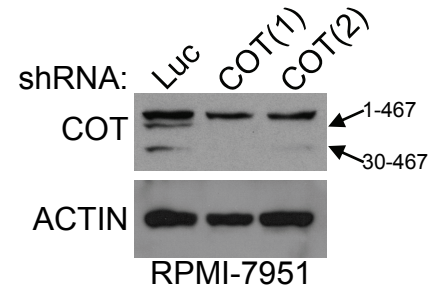

**Supplementary Fig. 16:** Depletion of COT affects viability in the COT amplified cell line RPMI-7951. (a) Quantification of RPMI-7951 viability following lentiviral shRNA-mediated COT depletion (shCOT), relative to control shRNA (shLuc). Error bars represent standard deviation between replicates. (b) Immunoblot analysis showing relative COT protein expression in shLuc and shCOT-expressing RPMI-7951.



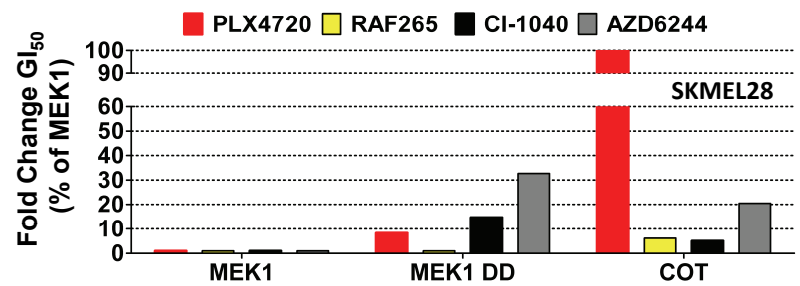

**Supplementary Fig. 17:** Effects of ORF expression on the  $GI_{50}$  of a panel of MAPK pathway inhibitors in SKMEL28. The half-maximal growth-inhibitory concentration ( $GI_{50}$ ) of SKMEL28 ectopically expressing MEK1, MEK1<sup>DD</sup> or COT was determined for the RAF inhibitors PLX4720 and RAF265 and the MEK1/2 inhibitors CI-1040 and AZD6244. The change in  $GI_{50}$  for MEK1<sup>DD</sup> and COT (relative to MEK1) was determined for each compound.

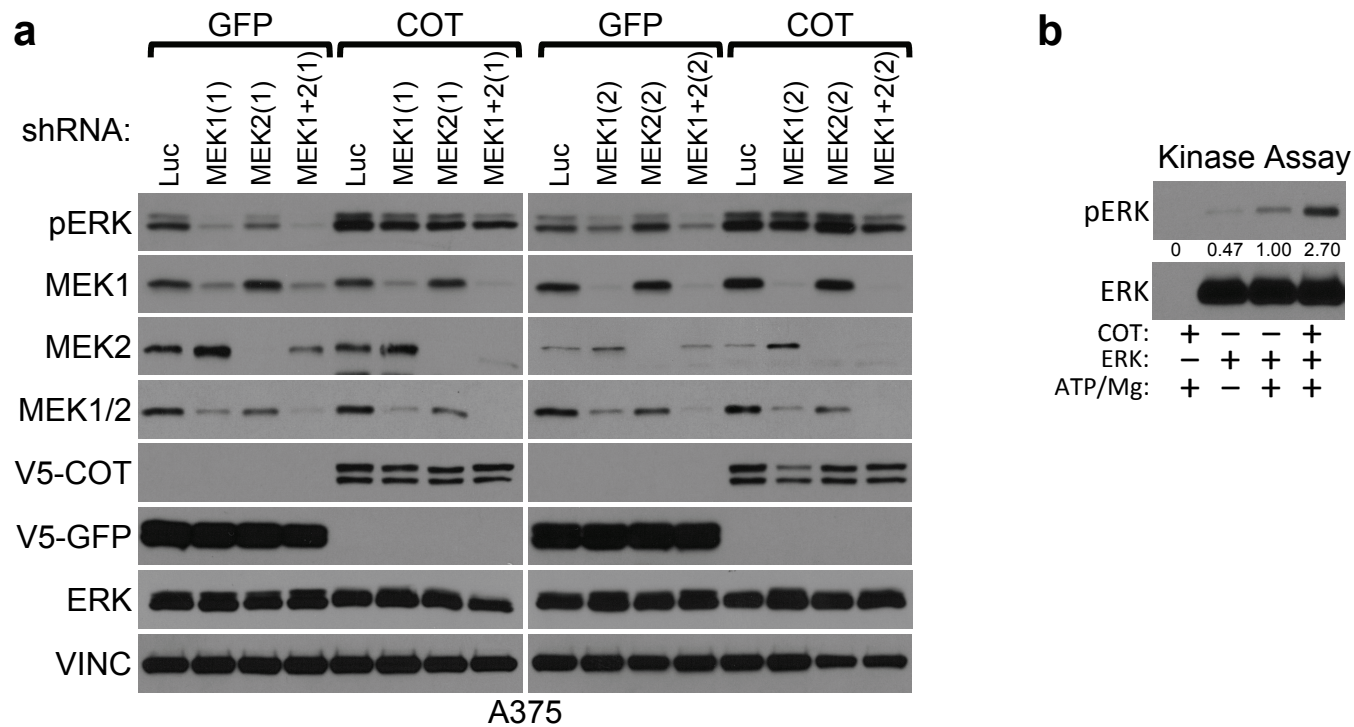

**Supplementary Fig. 18:** COT can activate ERK via MEK-independent and MEK-dependent mechanisms. (a) Immunoblot analysis of ERK phosphorylation in lysates from A375 following expression of GFP or COT and subsequent lentiviral shRNA-mediated MEK1, MEK2 or MEK1 and MEK2 (MEK1+2) depletion, relative to control shRNA (shLuc). Left and right panels represent two different pairs of MEK1 and MEK2 shRNA constructs. (b) Immunoblot blot analysis of recombinant, inactive ERK phosphorylation (Thr202/Tyr204) by recombinant COT in an *in vitro* kinase assay.

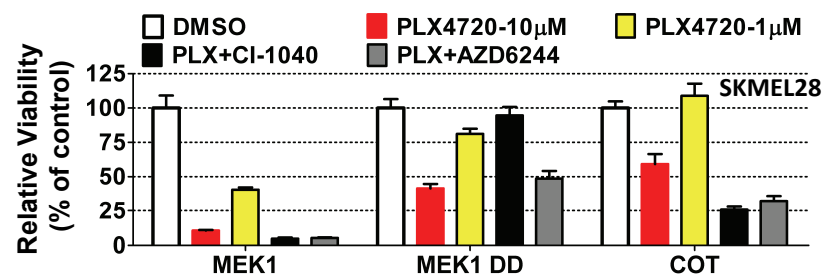

**Supplementary Fig. 19:** Combinatorial MAPK pathway inhibition effectively suppresses proliferation in SKMEL28. Viability (relative to DMSO) of SKMEL28 ectopically expressing MEK1, MEK1<sup>DD</sup> or COT and treated with DMSO, PLX4720 (concentration indicated), PLX4720 (1  $\mu$ M) and CI-1040 (1  $\mu$ M) or PLX4720 (1  $\mu$ M) and AZD6244 (1  $\mu$ M). Error bars represent the standard deviation between replicates.

## Supplementary Table 1: CCSB/Broad Institute Kinase ORF Library description and ORF classification

**Abbreviations:** RS/TK(Receptor Serine/Threonine Kinase); RTK (Receptor Tyrosine Kinase); NRS/TK(Non-Receptor Serine/Threonine Kinase); NRTK (Non-Receptor Tyrosine Kinase)

| GENE     | GENE ID | DESCRIPTION                                                                        | KINASE CLASS            |
|----------|---------|------------------------------------------------------------------------------------|-------------------------|
| AAK1     | 22848   | AP2 associated kinase 1                                                            | protein kinase (NRS/TK) |
| ABL1     | 25      | v-abl Abelson murine leukemia viral oncogene homolog 1                             | protein kinase (NRTK)   |
| ABL2     | 27      | v-abl Abelson murine leukemia viral oncogene homolog 2 (arg, Abelson-related gene) | protein kinase (NRTK)   |
| ACVR1    | 90      | activin A receptor, type I                                                         | protein kinase (RS/TK)  |
| ACVR1B   | 91      | activin A receptor, type IB                                                        | protein kinase (RS/TK)  |
| ACVR1C   | 130399  | activin A receptor, type IC                                                        | protein kinase (RS/TK)  |
| ACVR2A   | 92      | activin A receptor, type II                                                        | protein kinase (RS/TK)  |
| ACVR2B   | 93      | activin A receptor, type IIB                                                       | protein kinase (RS/TK)  |
| ACVRL1   | 94      | activin A receptor type II-like 1                                                  | protein kinase (RS/TK)  |
| ADCK1    | 57143   | aarF domain containing kinase 1                                                    | protein kinase          |
| ADCK2    | 90956   | aarF domain containing kinase 2                                                    | protein kinase          |
| ADCK4    | 79934   | aarF domain containing kinase 4                                                    | protein kinase          |
| ADPGK    | 83440   | ADP-dependent glucokinase                                                          | kinase related          |
| ADRBK1   | 156     | adrenergic, beta, receptor kinase 1                                                | protein kinase (NRS/TK) |
| ADRBK2   | 157     | adrenergic, beta, receptor kinase 2                                                | protein kinase (NRS/TK) |
| AGK      | 55750   | multiple substrate lipid kinase;MULK                                               | kinase related          |
| AK1      | 203     | adenylate kinase 1                                                                 | nucleotide kinase       |
| AK2      | 204     | adenylate kinase 2                                                                 | nucleotide kinase       |
| AK3      | 205     | adenylate kinase 3                                                                 | nucleotide kinase       |
| AK3L1    | 50808   | adenylate kinase 3 like 1                                                          | nucleotide kinase       |
| AK7      | 122481  | adenylate kinase 7                                                                 | nucleotide kinase       |
| AKT1     | 207     | v-akt murine thymoma viral oncogene homolog 1                                      | protein kinase (NRS/TK) |
| AKT3     | 10000   | v-akt murine thymoma viral oncogene homolog 3 (protein kinase B, gamma)            | protein kinase (NRS/TK) |
| ALDH18A1 | 5832    | aldehyde dehydrogenase 18 family, member A1;ALDH18A1                               | kinase related          |
| ALK      | 238     | anaplastic lymphoma kinase (Ki-1)                                                  | protein kinase (RTK)    |
| ALPK1    | 80216   | alpha-kinase 1                                                                     | protein kinase (NRS/TK) |
| ALPK2    | 115701  | alpha-kinase 2                                                                     | protein kinase (NRS/TK) |
| ALS2CR7  | 65061   | amyotrophic lateral sclerosis 2 (juvenile) chromosome region, candidate 7          | protein kinase (NRS/TK) |
| AMHR2    | 269     | anti-Mullerian hormone receptor, type II                                           | protein kinase (RS/TK)  |
| ARAF     | 369     | v-raf murine sarcoma 3611 viral oncogene homolog 1                                 | protein kinase (NRS/TK) |
| ARSG     | 22901   | arylsulfatase G;ARSG                                                               | kinase related          |
| ASCIZ    | 23300   | ATM/ATR-Substrate Chk2-Interacting Zn2+-finger protein;ASCIZ                       | protein kinase (NRS/TK) |
| AURKA    | 6790    | serine/threonine kinase 6                                                          | protein kinase (NRS/TK) |
| AURKB    | 9212    | aurora kinase B                                                                    | protein kinase (NRS/TK) |
| AURKC    | 6795    | aurora kinase C                                                                    | protein kinase (NRS/TK) |
| AXL      | 558     | AXL receptor tyrosine kinase                                                       | protein kinase (RTK)    |
| BCKDK    | 10295   | branched chain alpha-ketoacid dehydrogenase kinase                                 | protein kinase          |
| BLK      | 640     | B lymphoid tyrosine kinase                                                         | protein kinase (NRTK)   |
| BMP2K    | 55589   | BMP2 inducible kinase                                                              | protein kinase (NRS/TK) |
| BMP2KL   | 347359  | BMP2 inducible kinase-like                                                         | protein kinase (NRS/TK) |
| BMPRI1A  | 657     | bone morphogenetic protein receptor, type IA                                       | protein kinase (RS/TK)  |
| BMPRI1B  | 658     | bone morphogenetic protein receptor, type IB                                       | protein kinase (RS/TK)  |
| BMPRI2   | 659     | bone morphogenetic protein receptor, type II (serine/threonine kinase)             | protein kinase (RS/TK)  |
| BMX      | 660     | BMX non-receptor tyrosine kinase                                                   | protein kinase (NRTK)   |
| BRAF     | 673     | v-raf murine sarcoma viral oncogene homolog B1                                     | protein kinase (NRS/TK) |
| BRD3     | 8019    | bromodomain containing 3                                                           | protein kinase (NRS/TK) |
| BRD4     | 23476   | bromodomain containing 4                                                           | protein kinase (NRS/TK) |
| BRSK1    | 84446   | KIAA1811 protein                                                                   | protein kinase (NRS/TK) |
| BRSK2    | 9024    | serine/threonine kinase 29                                                         | protein kinase (NRS/TK) |
| BTK      | 695     | Bruton agammaglobulinemia tyrosine kinase                                          | protein kinase (NRTK)   |
| BUB1     | 699     | BUB1 budding uninhibited by benzimidazoles 1 homolog (yeast)                       | protein kinase (NRS/TK) |
| BUB1B    | 701     | BUB1 budding uninhibited by benzimidazoles 1 homolog beta (yeast)                  | protein kinase (NRS/TK) |
| C1orf57  | 84284   | chromosome 1 open reading frame 57;C1orf57                                         | kinase related          |
| C9orf95  | 54981   | chromosome 9 open reading frame 95;C9orf95                                         | kinase related          |
| C9orf98  | 158067  | chromosome 9 open reading frame 98;C9orf98                                         | nucleotide kinase       |
| CABC1    | 56997   | chaperone, ABC1 activity of bc1 complex like (S. pombe)                            | protein kinase          |
| CALM1    | 801     | calmodulin 1 (phosphorylase kinase, delta)                                         | kinase related          |
| CALM2    | 805     | calmodulin 2 (phosphorylase kinase, delta)                                         | kinase related          |
| CALM3    | 808     | calmodulin 3 (phosphorylase kinase, delta)                                         | kinase related          |
| CAMK1    | 8536    | calcium/calmodulin-dependent protein kinase I                                      | protein kinase (NRS/TK) |
| CAMK1D   | 57118   | calcium/calmodulin-dependent protein kinase ID                                     | protein kinase (NRS/TK) |
| CAMK1G   | 57172   | calcium/calmodulin-dependent protein kinase IG                                     | protein kinase (NRS/TK) |
| CAMK2A   | 815     | calcium/calmodulin-dependent protein kinase (CaM kinase) II alpha                  | protein kinase (NRS/TK) |
| CAMK2B   | 816     | calcium/calmodulin-dependent protein kinase (CaM kinase) II beta                   | protein kinase (NRS/TK) |
| CAMK2D   | 817     | calcium/calmodulin-dependent protein kinase (CaM kinase) II delta                  | protein kinase (NRS/TK) |
| CAMK2G   | 818     | calcium/calmodulin-dependent protein kinase (CaM kinase) II gamma                  | protein kinase (NRS/TK) |
| CAMK4    | 814     | calcium/calmodulin-dependent protein kinase IV                                     | protein kinase (NRS/TK) |
| CAMKK1   | 84254   | calcium/calmodulin-dependent protein kinase kinase 1, alpha                        | protein kinase (NRS/TK) |
| CAMKK2   | 10645   | calcium/calmodulin-dependent protein kinase kinase 2, beta                         | protein kinase (NRS/TK) |
| CAMKV    | 79012   | hypothetical protein MGC8407                                                       | protein kinase (NRS/TK) |
| CARD11   | 84433   | caspase recruitment domain family, member 11;CARD11                                | nucleotide kinase       |
| CARKL    | 23729   | carbohydrate kinase-like                                                           | carbohydrate kinase     |
| CASK     | 8573    | calcium/calmodulin-dependent serine protein kinase (MAGUK family)                  | nucleotide kinase       |
| CCL2     | 6347    | chemokine (C-C motif) ligand 2;CCL2                                                | protein kinase          |
| CCL4     | 6351    | chemokine (C-C motif) ligand 4;CCL4                                                | protein kinase (RTK)    |
| CCRK     | 23552   | cell cycle related kinase                                                          | protein kinase (NRS/TK) |
| CD2      | 914     | CD2 antigen (p50), sheep red blood cell receptor;CD2                               | protein kinase          |
| CDC2     | 983     | cell division cycle 2, G1 to S and G2 to M                                         | protein kinase (NRS/TK) |
| CDC2L1   | 984     | cell division cycle 2-like 1 (PITSLRE proteins)                                    | protein kinase (NRS/TK) |
| CDC2L2   | 985     | cell division cycle 2-like 2 (PITSLRE proteins)                                    | protein kinase (NRS/TK) |
| CDC2L6   | 23097   | cell division cycle 2-like 6 (CDK8-like)                                           | protein kinase (NRS/TK) |
| CDC42BPG | 55561   | CDC42 binding protein kinase gamma (DMPK-like)                                     | protein kinase (NRS/TK) |
| CDC7     | 8317    | CDC7 cell division cycle 7 (S. cerevisiae)                                         | protein kinase (NRS/TK) |
| CDK10    | 8558    | cyclin-dependent kinase (CDC2-like) 10                                             | protein kinase (NRS/TK) |
| CDK2     | 1017    | cyclin-dependent kinase 2                                                          | protein kinase (NRS/TK) |
| CDK3     | 1018    | cyclin-dependent kinase 3                                                          | protein kinase (NRS/TK) |
| CDK4     | 1019    | cyclin-dependent kinase 4                                                          | protein kinase (NRS/TK) |
| CDK5     | 1020    | cyclin-dependent kinase 5                                                          | protein kinase (NRS/TK) |
| CDK5R1   | 8851    | cyclin-dependent kinase 5, regulatory subunit 1 (p35)                              | protein kinase (NRS/TK) |

|               |        |                                                                                                                |                         |
|---------------|--------|----------------------------------------------------------------------------------------------------------------|-------------------------|
| CDK6          | 1021   | cyclin-dependent kinase 6                                                                                      | protein kinase (NRS/TK) |
| CDK7          | 1022   | cyclin-dependent kinase 7 (MO15 homolog, Xenopus laevis, cdk-activating kinase)                                | protein kinase (NRS/TK) |
| CDK8          | 1024   | cyclin-dependent kinase 8                                                                                      | protein kinase (NRS/TK) |
| CDK9          | 1025   | cyclin-dependent kinase 9 (CDC2-related kinase)                                                                | protein kinase (NRS/TK) |
| CDKL1         | 8814   | cyclin-dependent kinase-like 1 (CDC2-related kinase)                                                           | protein kinase (NRS/TK) |
| CDKL2         | 8999   | cyclin-dependent kinase-like 2 (CDC2-related kinase)                                                           | protein kinase (NRS/TK) |
| CDKL3         | 51265  | cyclin-dependent kinase-like 3                                                                                 | protein kinase (NRS/TK) |
| CDKL4         | 344387 | cyclin-dependent kinase-like 4                                                                                 | protein kinase (NRS/TK) |
| CDKL5         | 6792   | cyclin-dependent kinase-like 5                                                                                 | protein kinase (NRS/TK) |
| CHEK1         | 1111   | CHK1 checkpoint homolog (S. pombe)                                                                             | protein kinase (NRS/TK) |
| CHEK2         | 11200  | CHK2 checkpoint homolog (S. pombe)                                                                             | protein kinase (NRS/TK) |
| CHKA          | 1119   | choline kinase alpha                                                                                           | kinase related          |
| CIB1          | 10519  | calcium and integrin binding 1 (calmyrin):CIB1                                                                 | kinase related          |
| CIB4          | 130106 | calcium and integrin binding family member 4:CIB4                                                              | kinase related          |
| CKB           | 1152   | creatine kinase, brain                                                                                         | kinase related          |
| CKM           | 1158   | creatine kinase, muscle                                                                                        | kinase related          |
| CKMT1A        | 548596 | creatine kinase, mitochondrial 1A;CKMT1A                                                                       | kinase related          |
| CKMT2         | 1160   | creatine kinase, mitochondrial 2 (sarcomeric)                                                                  | kinase related          |
| CKS1B         | 1163   | CDC28 protein kinase regulatory subunit 1B                                                                     | protein kinase          |
| CKS2          | 1164   | CDC28 protein kinase regulatory subunit 2                                                                      | protein kinase          |
| CLK1          | 1195   | CDC-like kinase 1                                                                                              | protein kinase (NRS/TK) |
| CLK2          | 1196   | CDC-like kinase 2                                                                                              | protein kinase (NRS/TK) |
| CLK3          | 1198   | CDC-like kinase 3                                                                                              | protein kinase (NRS/TK) |
| COASY         | 80347  | Coenzyme A synthase;COASY                                                                                      | kinase related          |
| COL4A3BP      | 10087  | collagen, type IV, alpha 3 (Goodpasture antigen) binding protein;COL4A3BP                                      | protein kinase          |
| CRKL          | 1399   | v-crk sarcoma virus CT10 oncogene homolog (avian)-like;CRKL                                                    | kinase related          |
| CSF1R         | 1436   | colony stimulating factor 1 receptor, formerly McDonough feline sarcoma viral (v-fms) oncogene homolog         | protein kinase (RTK)    |
| CSK           | 1445   | c-src tyrosine kinase                                                                                          | protein kinase (NRTK)   |
| CSNK1A1       | 1452   | casein kinase 1, alpha 1                                                                                       | protein kinase (NRS/TK) |
| CSNK1A1L      | 122011 | casein kinase 1, alpha 1-like                                                                                  | protein kinase (NRS/TK) |
| CSNK1D        | 1453   | casein kinase 1, delta                                                                                         | protein kinase (NRS/TK) |
| CSNK1E        | 1454   | casein kinase 1, epsilon                                                                                       | protein kinase (NRS/TK) |
| CSNK1G1       | 53944  | casein kinase 1, gamma 1                                                                                       | protein kinase (NRS/TK) |
| CSNK1G2       | 1455   | casein kinase 1, gamma 2                                                                                       | protein kinase (NRS/TK) |
| CSNK1G3       | 1456   | casein kinase 1, gamma 3                                                                                       | protein kinase (NRS/TK) |
| CSNK2A1       | 1457   | casein kinase 2, alpha 1 polypeptide                                                                           | protein kinase (NRS/TK) |
| CSNK2B        | 1460   | casein kinase 2, beta polypeptide                                                                              | protein kinase (NRS/TK) |
| DAK           | 26007  | dihydroxyacetone kinase 2 homolog (S. cerevisiae);DAK                                                          | kinase related          |
| DAPK1         | 1612   | death-associated protein kinase 1                                                                              | protein kinase (NRS/TK) |
| DAPK2         | 23604  | death-associated protein kinase 2                                                                              | protein kinase (NRS/TK) |
| DAPK3         | 1613   | death-associated protein kinase 3                                                                              | protein kinase (NRS/TK) |
| DCAKD         | 79877  | dephospho-CoA kinase domain containing;DCAKD                                                                   | kinase related          |
| DCAMKL2       | 166614 | hypothetical protein MGC45428                                                                                  | protein kinase (NRS/TK) |
| DCK           | 1633   | deoxycytidine kinase                                                                                           | nucleotide kinase       |
| DDR1          | 780    | discoidin domain receptor family, member 1                                                                     | protein kinase (RTK)    |
| DDR2          | 4921   | discoidin domain receptor family, member 2                                                                     | protein kinase (RTK)    |
| DGKA          | 1606   | diacylglycerol kinase, alpha 80kDa                                                                             | kinase related          |
| DGKB          | 1607   | diacylglycerol kinase, beta 90kDa                                                                              | kinase related          |
| DGKG          | 1608   | diacylglycerol kinase, gamma 90kDa                                                                             | kinase related          |
| DGKK          | 139189 | diacylglycerol kinase, kappa;DGKK                                                                              | kinase related          |
| DGKZ          | 8525   | diacylglycerol kinase, zeta 104kDa                                                                             | kinase related          |
| DGUOK         | 1716   | deoxyguanosine kinase                                                                                          | nucleotide kinase       |
| DKFZp434B1231 | 91156  | eEF1A2 binding protein;DKFZp434B1231                                                                           | protein kinase (NRS/TK) |
| DKFZp761P0423 | 157285 | hypothetical protein DKFZp761P0423                                                                             | protein kinase (RS/TK)  |
| DLG1          | 1739   | discs, large homolog 1 (Drosophila);DLG1                                                                       | nucleotide kinase       |
| DLG3          | 1741   | discs, large homolog 3 (neuroendocrine-dlg, Drosophila);DLG3                                                   | nucleotide kinase       |
| DTYMK         | 1841   | deoxythymidylate kinase (thymidylate kinase)                                                                   | nucleotide kinase       |
| DYRK1A        | 1859   | dual-specificity tyrosine-(Y)-phosphorylation regulated kinase 1A                                              | protein kinase (NRS/TK) |
| DYRK1B        | 9149   | dual-specificity tyrosine-(Y)-phosphorylation regulated kinase 1B                                              | protein kinase (NRS/TK) |
| DYRK2         | 8445   | dual-specificity tyrosine-(Y)-phosphorylation regulated kinase 2                                               | protein kinase (NRS/TK) |
| DYRK3         | 8444   | dual-specificity tyrosine-(Y)-phosphorylation regulated kinase 3                                               | protein kinase (NRS/TK) |
| DYRK4         | 8798   | dual-specificity tyrosine-(Y)-phosphorylation regulated kinase 4                                               | protein kinase (NRS/TK) |
| EEF2K         | 29904  | eukaryotic elongation factor-2 kinase                                                                          | protein kinase (NRS/TK) |
| EGFR          | 1956   | epidermal growth factor receptor (erythroblastic leukemia viral (v-erb-b) oncogene homolog, avian)             | protein kinase (RTK)    |
| EIF2AK1       | 27102  | heme-regulated initiation factor 2-alpha kinase                                                                | protein kinase (NRS/TK) |
| EIF2AK4       | 415116 | serine/threonine-protein kinase pim-3                                                                          | protein kinase (RS/TK)  |
| EPHA1         | 2041   | EPH receptor A1                                                                                                | protein kinase (RTK)    |
| EPHA2         | 1969   | EPH receptor A2                                                                                                | protein kinase (RTK)    |
| EPHA3         | 2042   | EPH receptor A3                                                                                                | protein kinase (RTK)    |
| EPHA4         | 2043   | EPH receptor A4                                                                                                | protein kinase (RTK)    |
| EPHA6         | 285220 | EPH receptor A6                                                                                                | protein kinase (RTK)    |
| EPHB1         | 2047   | EPH receptor B1                                                                                                | protein kinase (RTK)    |
| EPHB4         | 2050   | EPH receptor B4                                                                                                | protein kinase (RTK)    |
| EPHB6         | 2051   | EPH receptor B6                                                                                                | protein kinase (RTK)    |
| ERBB2         | 2064   | v-erb-b2 erythroblastic leukemia viral oncogene homolog 2, neuro/glioblastoma derived oncogene homolog (avian) | protein kinase (RTK)    |
| ERBB3         | 2065   | v-erb-b2 erythroblastic leukemia viral oncogene homolog 3 (avian)                                              | protein kinase (RTK)    |
| ERBB4         | 2066   | v-erb-a erythroblastic leukemia viral oncogene homolog 4 (avian)                                               | protein kinase (RTK)    |
| ERN1          | 2081   | endoplasmic reticulum to nucleus signalling 1                                                                  | protein kinase          |
| ETNK1         | 55500  | ethanolamine kinase 1                                                                                          | kinase related          |
| ETNK2         | 55224  | ethanolamine kinase 2                                                                                          | kinase related          |
| EXOSC10       | 5394   | exosome component 10;EXOSC10                                                                                   | protein kinase (NRS/TK) |
| FASTK         | 10922  | FAST kinase                                                                                                    | protein kinase (NRS/TK) |
| FASTKD1       | 79675  | FAST kinase domains 1;FASTKD1                                                                                  | protein kinase          |
| FASTKD2       | 22868  | FAST kinase domains 2;FASTKD2                                                                                  | protein kinase          |
| FASTKD3       | 79072  | FAST kinase domains 3;FASTKD3                                                                                  | protein kinase          |
| FASTKD5       | 60493  | FAST kinase domains 5;FASTKD5                                                                                  | protein kinase          |
| FER           | 2241   | fer (fps/fes related) tyrosine kinase (phosphoprotein NCP94)                                                   | protein kinase (NRTK)   |
| FES           | 2242   | feline sarcoma oncogene                                                                                        | protein kinase (NRTK)   |
| FGFR1         | 2260   | fibroblast growth factor receptor 1 (fms-related tyrosine kinase 2, Pfeiffer syndrome)                         | protein kinase (RTK)    |
| FGFR2         | 2263   | fibroblast growth factor receptor 2 ( craniofacial dysostosis 1, Crouzon, Pfeiffer and Jackson-Weiss syndrome) | protein kinase (RTK)    |
| FGFR3         | 2261   | fibroblast growth factor receptor 3 (achondroplasia, thanatophoric dwarfism)                                   | protein kinase (RTK)    |
| FGFRL1        | 53834  | fibroblast growth factor receptor-like 1;FGFRL1                                                                | protein kinase (RTK)    |
| FGFR          | 2268   | Gardner-Rasheed feline sarcoma viral (v-igr) oncogene homolog                                                  | protein kinase (NRTK)   |
| FLJ10986      | 55277  | hypothetical protein FLJ10986;FLJ10986                                                                         | carbohydrate kinase     |
| FLJ23356      | 84197  | hypothetical protein FLJ23356                                                                                  | protein kinase          |
| FLJ25006      | 124923 | hypothetical protein FLJ25006                                                                                  | protein kinase (NRS/TK) |

|           |        |                                                                                                                |                         |
|-----------|--------|----------------------------------------------------------------------------------------------------------------|-------------------------|
| FLJ40852  | 285962 | hypothetical protein FLJ40852                                                                                  | protein kinase          |
| FLT1      | 2321   | fms-related tyrosine kinase 1 (vascular endothelial growth factor/vascular permeability factor receptor)       | protein kinase (RTK)    |
| FLT3      | 2322   | fms-related tyrosine kinase 3                                                                                  | protein kinase (RTK)    |
| FLT4      | 2324   | fms-related tyrosine kinase 4                                                                                  | protein kinase (RTK)    |
| FN3K      | 64122  | fructosamine 3 kinase                                                                                          | kinase related          |
| FN3KRP    | 79672  | fructosamine-3-kinase-related protein                                                                          | kinase related          |
| FRK       | 2444   | fyn-related kinase                                                                                             | protein kinase (NRTK)   |
| FUK       | 197258 | fucokinase                                                                                                     | kinase related          |
| FXN       | 2395   | frataxin;FXN                                                                                                   | kinase related          |
| FYN       | 2534   | FYN oncogene related to SRC, FGR, YES                                                                          | protein kinase (NRTK)   |
| GALK1     | 2584   | galactokinase 1                                                                                                | carbohydrate kinase     |
| GALK2     | 2585   | galactokinase 2                                                                                                | carbohydrate kinase     |
| GCK       | 2645   | glucokinase (hexokinase 4, maturity onset diabetes of the young 2)                                             | carbohydrate kinase     |
| GK        | 2710   | glycerol kinase                                                                                                | carbohydrate kinase     |
| GK2       | 2712   | glycerol kinase 2                                                                                              | carbohydrate kinase     |
| GK5       | 256356 | hypothetical protein MGC40579;MGC40579                                                                         | carbohydrate kinase     |
| GLYCTK    | 132158 | glycerate kinase                                                                                               | carbohydrate kinase     |
| GNE       | 10020  | glucosamine (UDP-N-acetyl)-2-epimerase/N-acetylmannosamine kinase                                              | carbohydrate kinase     |
| GRK6      | 2870   | G protein-coupled receptor kinase 6                                                                            | protein kinase (NRS/TK) |
| GRK7      | 131890 | G protein-coupled receptor kinase 7                                                                            | protein kinase (NRS/TK) |
| GSG2      | 83903  | haspin                                                                                                         | protein kinase (RS/TK)  |
| GSK3A     | 2931   | glycogen synthase kinase 3 alpha                                                                               | protein kinase (NRS/TK) |
| GTF2H1    | 2965   | general transcription factor IIH, polypeptide 1, 62kDa;GTF2H1                                                  | protein kinase (NRS/TK) |
| GUK1      | 2987   | guanylate kinase 1                                                                                             | nucleotide kinase       |
| HCK       | 3055   | hemopoietic cell kinase                                                                                        | protein kinase (NRTK)   |
| HIPK1     | 204851 | homeodomain interacting protein kinase 1                                                                       | protein kinase (NRS/TK) |
| HIPK2     | 28996  | homeodomain interacting protein kinase 2                                                                       | protein kinase (NRS/TK) |
| HIPK3     | 10114  | homeodomain interacting protein kinase 3                                                                       | protein kinase (NRS/TK) |
| HIPK4     | 147746 | homeodomain interacting protein kinase 4                                                                       | protein kinase (NRS/TK) |
| HK1       | 3098   | hexokinase 1                                                                                                   | carbohydrate kinase     |
| HK2       | 3099   | hexokinase 2                                                                                                   | carbohydrate kinase     |
| HK3       | 3101   | hexokinase 3 (white cell)                                                                                      | carbohydrate kinase     |
| HKDC1     | 80201  | hexokinase domain containing 1;HKDC1                                                                           | carbohydrate kinase     |
| HSPB8     | 26353  | heat shock 22kDa protein 8                                                                                     | protein kinase (NRS/TK) |
| IGF1R     | 3480   | insulin-like growth factor 1 receptor                                                                          | protein kinase (RTK)    |
| IHPK1     | 9807   | inositol hexaphosphate kinase 1                                                                                | kinase related          |
| IHPK2     | 51447  | inositol hexaphosphate kinase 2                                                                                | Lipid Kinase            |
| IHPK3     | 117283 | inositol hexaphosphate kinase 3                                                                                | Lipid Kinase            |
| IKBKE     | 9641   | inhibitor of kappa light polypeptide gene enhancer in B-cells, kinase epsilon                                  | protein kinase (NRS/TK) |
| ILK       | 3611   | integrin-linked kinase                                                                                         | protein kinase (NRS/TK) |
| INSRR     | 3645   | insulin receptor-related receptor                                                                              | protein kinase (RTK)    |
| IPMK      | 253430 | inositol polyphosphate multikinase                                                                             | Lipid Kinase            |
| IPPK      | 64768  | inositol 1,3,4,5,6-pentakisphosphate 2-kinase;IPPK                                                             | Lipid Kinase            |
| IRAK2     | 3656   | interleukin-1 receptor-associated kinase 2                                                                     | protein kinase (RS/TK)  |
| IRAK3     | 11213  | interleukin-1 receptor-associated kinase 3                                                                     | protein kinase (RS/TK)  |
| IRAK4     | 51135  | interleukin-1 receptor-associated kinase 4                                                                     | protein kinase (RS/TK)  |
| ITGB1BP3  | 27231  | integrin beta 1 binding protein 3;ITGB1BP3                                                                     | kinase related          |
| ITK       | 3702   | IL2-inducible T-cell kinase                                                                                    | protein kinase (NRTK)   |
| ITPKB     | 3707   | inositol 1,4,5-trisphosphate 3-kinase B                                                                        | kinase related          |
| JAK1      | 3716   | Janus kinase 1 (a protein tyrosine kinase)                                                                     | protein kinase (NRTK)   |
| JAK2      | 3717   | Janus kinase 2 (a protein tyrosine kinase)                                                                     | protein kinase (NRTK)   |
| JAK3      | 3718   | Janus kinase 3 (a protein tyrosine kinase, leukocyte)                                                          | protein kinase (NRTK)   |
| KDR       | 3791   | kinase insert domain receptor (a type III receptor tyrosine kinase)                                            | protein kinase (RTK)    |
| KHK       | 3795   | ketoheokinase (fructokinase)                                                                                   | carbohydrate kinase     |
| KIAA0999  | 23387  | KIAA0999 protein                                                                                               | protein kinase (RS/TK)  |
| KIAA2002  | 79834  | KIAA2002 protein                                                                                               | protein kinase (RS/TK)  |
| KSR       | 8844   | kinase suppressor of ras                                                                                       | protein kinase (NRS/TK) |
| KSR2      | 283455 | kinase suppressor of Ras-2                                                                                     | protein kinase (NRS/TK) |
| LATS1     | 9113   | LATS, large tumor suppressor, homolog 1 (Drosophila)                                                           | protein kinase (NRS/TK) |
| LATS2     | 26524  | LATS, large tumor suppressor, homolog 2 (Drosophila)                                                           | protein kinase (NRS/TK) |
| LCK       | 3932   | lymphocyte-specific protein tyrosine kinase                                                                    | protein kinase (NRTK)   |
| LIMK1     | 3984   | LIM domain kinase 1                                                                                            | protein kinase (NRS/TK) |
| LIMK2     | 3985   | LIM domain kinase 2                                                                                            | protein kinase (NRS/TK) |
| LMTK2     | 22853  | lemur tyrosine kinase 2                                                                                        | protein kinase (RTK)    |
| LOC220686 | 220686 | hypothetical protein LOC220686;LOC220686                                                                       | kinase related          |
| LOC340156 | 340156 | hypothetical protein LOC340156                                                                                 | protein kinase (NRS/TK) |
| LOC340371 | 340371 | hypothetical protein LOC340371                                                                                 | protein kinase (NRS/TK) |
| LOC375133 | 375133 | similar to phosphatidylinositol 4-kinase alpha                                                                 | Lipid Kinase            |
| LOC388957 | 388957 | similar to BMP2 inducible kinase                                                                               | protein kinase (NRS/TK) |
| LOC389599 | 389599 | similar to amyotrophic lateral sclerosis 2 (juvenile) chr. region, candidate 2; ILP-interacting protein ILPIPA | protein kinase          |
| LOC390877 | 390877 | similar to adenylate kinase (EC 2.7.4.3), cytosolic - common carp                                              | nucleotide kinase       |
| LOC42075  | 442075 | similar to serine/threonine kinase, establishes embryonic polarity                                             | protein kinase (NRS/TK) |
| LOC54103  | 54103  | hypothetical protein LOC54103;LOC54103                                                                         | protein kinase (RTK)    |
| LOC646505 | 646505 | similar to Dual specificity protein kinase CLK3 (CDC-like kinase 3);unassigned                                 | protein kinase (NRS/TK) |
| LOC647279 | 647279 | similar to MAP/microtubule affinity-regulating kinase 3;unassigned                                             | protein kinase (NRS/TK) |
| LOC648152 | 648152 | similar to ataxia telangiectasia and Rad3 related protein;unassigned                                           | protein kinase (NRS/TK) |
| LOC649288 | 649288 | similar to Adenylate kinase isoenzyme 4, mitochondrial (Adenylate kinase 3-like 1)                             | nucleotide kinase       |
| LOC650122 | 650122 | similar to choline kinase alpha isoform a;unassigned                                                           | kinase related          |
| LOC652722 | 652722 | similar to PTK2 protein tyrosine kinase 2 isoform a;unassigned                                                 | protein kinase (NRTK)   |
| LOC652799 | 652799 | similar to Mast/stem cell growth factor receptor precursor (SCFR) (c-kit) (CD117 antigen);unassigned           | protein kinase (RTK)    |
| LOC653052 | 653052 | similar to Homeodomain-interacting protein kinase 2 (hHIPK2);unassigned                                        | protein kinase (NRS/TK) |
| LOC653155 | 653155 | similar to PRP4 pre-mRNA processing factor 4 homolog B;unassigned                                              | protein kinase (NRS/TK) |
| LOC727761 | 727761 | similar to deoxythymidylate kinase (thymidylate kinase);unassigned                                             | nucleotide kinase       |
| LOC730000 | 730000 | similar to testis-specific serine kinase 6;unassigned                                                          | protein kinase (NRS/TK) |
| LOC732306 | 732306 | similar to vaccinia related kinase 2;unassigned                                                                | protein kinase (NRS/TK) |
| LOC91461  | 91461  | hypothetical protein BC007901                                                                                  | protein kinase (NRTK)   |
| LOC91807  | 91807  | myosin light chain kinase (MLCK)                                                                               | protein kinase (NRS/TK) |
| LRGUK     | 136332 | leucine-rich repeats and guanylate kinase domain containing;LRGUK                                              | nucleotide kinase       |
| LRPPRC    | 10128  | leucine-rich PPR-motif containing;LRPPRC                                                                       | protein kinase (RS/TK)  |
| LRRK2     | 120892 | leucine-rich repeat kinase 2                                                                                   | protein kinase (NRS/TK) |
| LYK5      | 92335  | protein kinase LYK5                                                                                            | protein kinase          |
| LYN       | 4067   | v-yes-1 Yamaguchi sarcoma viral related oncogene homolog                                                       | protein kinase (NRTK)   |
| MAGI1     | 9223   | membrane associated guanylate kinase, WW and PDZ domain containing 1;MAGI1                                     | nucleotide kinase       |
| MAK       | 4117   | male germ cell-associated kinase                                                                               | protein kinase (NRS/TK) |
| MAP2K1    | 5604   | mitogen-activated protein kinase kinase 1                                                                      | protein kinase          |
| MAP2K1IP1 | 8649   | mitogen-activated protein kinase kinase 1 interacting protein 1                                                | protein kinase          |

|           |        |                                                                                          |                         |
|-----------|--------|------------------------------------------------------------------------------------------|-------------------------|
| MAP2K2    | 5605   | mitogen-activated protein kinase kinase 2                                                | protein kinase          |
| MAP2K5    | 5607   | mitogen-activated protein kinase kinase 5                                                | protein kinase          |
| MAP2K6    | 5608   | mitogen-activated protein kinase kinase 6                                                | protein kinase          |
| MAP2K7    | 5609   | mitogen-activated protein kinase kinase 7                                                | protein kinase          |
| MAP3K11   | 4296   | mitogen-activated protein kinase kinase kinase 11                                        | protein kinase (NRS/TK) |
| MAP3K12   | 7786   | mitogen-activated protein kinase kinase kinase 12                                        | protein kinase (NRS/TK) |
| MAP3K14   | 9020   | mitogen-activated protein kinase kinase kinase 14                                        | protein kinase          |
| MAP3K15   | 389840 | FLJ16518 protein                                                                         | protein kinase          |
| MAP3K2    | 10746  | mitogen-activated protein kinase kinase kinase 2                                         | protein kinase          |
| MAP3K5    | 4217   | mitogen-activated protein kinase kinase kinase 5                                         | protein kinase          |
| MAP3K6    | 9064   | mitogen-activated protein kinase kinase kinase 6                                         | protein kinase          |
| MAP3K7    | 6885   | mitogen-activated protein kinase kinase kinase 7                                         | protein kinase (NRS/TK) |
| MAP3K8    | 1326   | mitogen-activated protein kinase kinase kinase 8                                         | protein kinase          |
| MAP4K1    | 11184  | mitogen-activated protein kinase kinase kinase kinase 1                                  | protein kinase          |
| MAP4K2    | 5871   | mitogen-activated protein kinase kinase kinase kinase 2                                  | protein kinase          |
| MAP4K3    | 8491   | mitogen-activated protein kinase kinase kinase kinase 3                                  | protein kinase          |
| MAP4K4    | 9448   | mitogen-activated protein kinase kinase kinase kinase 4                                  | protein kinase          |
| MAP4K5    | 11183  | mitogen-activated protein kinase kinase kinase kinase 5                                  | protein kinase          |
| MAPK1     | 5594   | mitogen-activated protein kinase 1                                                       | protein kinase (NRS/TK) |
| MAPK10    | 5602   | mitogen-activated protein kinase 10                                                      | protein kinase (NRS/TK) |
| MAPK12    | 6300   | mitogen-activated protein kinase 12                                                      | protein kinase (NRS/TK) |
| MAPK13    | 5603   | mitogen-activated protein kinase 13                                                      | protein kinase (NRS/TK) |
| MAPK14    | 1432   | mitogen-activated protein kinase 14                                                      | protein kinase (NRS/TK) |
| MAPK15    | 225689 | extracellular signal-regulated kinase 8                                                  | protein kinase (NRS/TK) |
| MAPK3     | 5595   | mitogen-activated protein kinase 3                                                       | protein kinase (NRS/TK) |
| MAPK4     | 5596   | mitogen-activated protein kinase 4                                                       | protein kinase (NRS/TK) |
| MAPK6     | 5597   | mitogen-activated protein kinase 6                                                       | protein kinase (NRS/TK) |
| MAPK8     | 5599   | mitogen-activated protein kinase 8                                                       | protein kinase (NRS/TK) |
| MAPK9     | 5601   | mitogen-activated protein kinase 9                                                       | protein kinase (NRS/TK) |
| MAPKAPK2  | 9261   | mitogen-activated protein kinase-activated protein kinase 2                              | protein kinase (NRS/TK) |
| MAPKAPK3  | 7867   | mitogen-activated protein kinase-activated protein kinase 3                              | protein kinase (NRS/TK) |
| MAPKAPK5  | 8550   | mitogen-activated protein kinase-activated protein kinase 5                              | protein kinase (NRS/TK) |
| MARK2     | 2011   | MAP/microtubule affinity-regulating kinase 2                                             | protein kinase (NRS/TK) |
| MARK3     | 4140   | MAP/microtubule affinity-regulating kinase 3                                             | protein kinase (NRS/TK) |
| MAST1     | 22983  | microtubule associated serine/threonine kinase 1                                         | protein kinase (NRS/TK) |
| MAST2     | 23139  | microtubule associated serine/threonine kinase 2                                         | protein kinase (NRS/TK) |
| MASTL     | 84930  | microtubule associated serine/threonine kinase-like                                      | protein kinase (NRS/TK) |
| MATK      | 4145   | megakaryocyte-associated tyrosine kinase                                                 | protein kinase (NRTK)   |
| MERTK     | 10461  | c-mer proto-oncogene tyrosine kinase                                                     | protein kinase (RTK)    |
| MET       | 4233   | met proto-oncogene (hepatocyte growth factor receptor)                                   | protein kinase (RTK)    |
| MGC16169  | 93627  | hypothetical protein MGC16169                                                            | protein kinase          |
| MGC42105  | 167359 | hypothetical protein MGC42105                                                            | protein kinase (NRS/TK) |
| MINK1     | 50488  | misshapen/NIK-related kinase                                                             | protein kinase          |
| MKNK1     | 8569   | MAP kinase interacting serine/threonine kinase 1                                         | protein kinase (NRS/TK) |
| MKNK2     | 2872   | MAP kinase interacting serine/threonine kinase 2                                         | protein kinase (NRS/TK) |
| MORN2     | 378464 | MORN repeat containing 2;MORN2                                                           | kinase related          |
| MOS       | 4342   | v-mos Moloney murine sarcoma viral oncogene homolog                                      | protein kinase (NRS/TK) |
| MPP1      | 4354   | membrane protein, palmitoylated 1, 55kDa;MPP1                                            | protein kinase          |
| MPP2      | 4355   | membrane protein, palmitoylated 2 (MAGUK p55 subfamily member 2);MPP2                    | nucleotide kinase       |
| MPP3      | 4356   | membrane protein, palmitoylated 3 (MAGUK p55 subfamily member 3);MPP3                    | nucleotide kinase       |
| MPP4      | 58538  | membrane protein, palmitoylated 4 (MAGUK p55 subfamily member 4);MPP4                    | nucleotide kinase       |
| MPP5      | 64398  | membrane protein, palmitoylated 5 (MAGUK p55 subfamily member 5);MPP5                    | nucleotide kinase       |
| MPP6      | 51678  | membrane protein, palmitoylated 6 (MAGUK p55 subfamily member 6);MPP6                    | nucleotide kinase       |
| MPP7      | 143098 | membrane protein, palmitoylated 7 (MAGUK p55 subfamily member 7);MPP7                    | nucleotide kinase       |
| MST1R     | 4486   | macrophage stimulating 1 receptor (c-met-related tyrosine kinase)                        | protein kinase (RTK)    |
| MUSK      | 4593   | muscle, skeletal, receptor tyrosine kinase                                               | protein kinase (RTK)    |
| MVK       | 4598   | mevalonate kinase (mevalonic aciduria)                                                   | kinase related          |
| MYLK2     | 85366  | myosin light chain kinase 2, skeletal muscle                                             | protein kinase (NRS/TK) |
| MYO3B     | 140469 | myosin IIIB                                                                              | protein kinase (NRS/TK) |
| NADK      | 65220  | NAD kinase                                                                               | kinase related          |
| NAGK      | 55577  | N-acetylglucosamine kinase                                                               | kinase related          |
| NEK10     | 152110 | NIMA (never in mitosis gene a)- related kinase 10                                        | protein kinase          |
| NEK11     | 79858  | NIMA (never in mitosis gene a)- related kinase 11                                        | protein kinase          |
| NEK2      | 4751   | NIMA (never in mitosis gene a)-related kinase 2                                          | protein kinase          |
| NEK3      | 4752   | NIMA (never in mitosis gene a)-related kinase 3                                          | protein kinase          |
| NEK4      | 6787   | NIMA (never in mitosis gene a)-related kinase 4                                          | protein kinase          |
| NEK5      | 341676 | NIMA (never in mitosis gene a)-related kinase 5                                          | protein kinase          |
| NEK6      | 10783  | NIMA (never in mitosis gene a)-related kinase 6                                          | protein kinase          |
| NEK7      | 140609 | NIMA (never in mitosis gene a)-related kinase 7                                          | protein kinase          |
| NEK8      | 284086 | NIMA (never in mitosis gene a)- related kinase 8                                         | protein kinase          |
| NEK9      | 91754  | NIMA (never in mitosis gene a)- related kinase 9                                         | protein kinase          |
| NJMU-R1   | 64149  | protein kinase Njmu-R1                                                                   | protein kinase          |
| NLK       | 51701  | nemo like kinase                                                                         | protein kinase (NRS/TK) |
| NME1      | 4830   | nucleoside-diphosphate kinase 1                                                          | nucleotide kinase       |
| NME1-NME2 | 654364 | NME1-NME2 protein;NME1-NME2                                                              | nucleotide kinase       |
| NME2      | 4831   | nucleoside-diphosphate kinase 2                                                          | nucleotide kinase       |
| NME3      | 4832   | nucleoside-diphosphate kinase 3                                                          | nucleotide kinase       |
| NME4      | 4833   | nucleoside-diphosphate kinase 4                                                          | nucleotide kinase       |
| NME5      | 8382   | non-metastatic cells 5, protein expressed in (nucleoside-diphosphate kinase)             | nucleotide kinase       |
| NME6      | 10201  | non-metastatic cells 6, protein expressed in (nucleoside-diphosphate kinase)             | nucleotide kinase       |
| NME7      | 29922  | non-metastatic cells 7, protein expressed in (nucleoside-diphosphate kinase)             | nucleotide kinase       |
| NPR2      | 4882   | natriuretic peptide receptor B/guanylate cyclase B (atrionatriuretic peptide receptor B) | protein kinase          |
| NRPB      | 29959  | nuclear receptor binding protein                                                         | protein kinase (NRS/TK) |
| NTRK1     | 4914   | neurotrophic tyrosine kinase, receptor, type 1                                           | protein kinase (RTK)    |
| NTRK2     | 4915   | neurotrophic tyrosine kinase, receptor, type 2                                           | protein kinase (RTK)    |
| NTRK3     | 4916   | neurotrophic tyrosine kinase, receptor, type 3                                           | protein kinase (RTK)    |
| NUAK2     | 81788  | likely ortholog of rat SNF1/AMP-activated protein kinase                                 | protein kinase (NRS/TK) |
| NUP62     | 23636  | nucleoporin 62kDa;NUP62                                                                  | protein kinase (NRS/TK) |
| NYD-SP25  | 89882  | protein kinase NYD-SP25                                                                  | protein kinase          |
| OXSRI     | 9943   | oxidative-stress responsive 1                                                            | protein kinase          |
| PAK1      | 5058   | p21/Cdc42/Rac1-activated kinase 1 (STE20 homolog, yeast)                                 | protein kinase          |
| PAK2      | 5062   | p21 (CDKN1A)-activated kinase 2                                                          | protein kinase          |
| PAK3      | 5063   | p21 (CDKN1A)-activated kinase 3                                                          | protein kinase          |
| PAK4      | 10298  | p21(CDKN1A)-activated kinase 4                                                           | protein kinase          |
| PAK6      | 56924  | p21(CDKN1A)-activated kinase 6                                                           | protein kinase          |
| PAK7      | 57144  | p21(CDKN1A)-activated kinase 7                                                           | protein kinase          |

|         |        |                                                                                            |                         |
|---------|--------|--------------------------------------------------------------------------------------------|-------------------------|
| PANK2   | 80025  | pantothenate kinase 2 (Hallervorden-Spatz syndrome)                                        | kinase related          |
| PANK3   | 79646  | pantothenate kinase 3                                                                      | kinase related          |
| PANK4   | 55229  | pantothenate kinase 4                                                                      | kinase related          |
| PAPSS1  | 9061   | 3-phosphoadenosine 5'-phosphosulfate synthase 1:PAPSS1                                     | kinase related          |
| PAPSS2  | 9060   | 3-phosphoadenosine 5'-phosphosulfate synthase 2:PAPSS2                                     | kinase related          |
| PBK     | 55872  | T-LAK cell-originated protein kinase                                                       | protein kinase          |
| PCK2    | 5106   | phosphoenolpyruvate carboxykinase 2 (mitochondrial)                                        | kinase related          |
| PCTK1   | 5127   | PCTAIRE protein kinase 1                                                                   | protein kinase (NRS/TK) |
| PCTK2   | 5128   | PCTAIRE protein kinase 2                                                                   | protein kinase (NRS/TK) |
| PCTK3   | 5129   | PCTAIRE protein kinase 3                                                                   | protein kinase (NRS/TK) |
| PDGFRA  | 5156   | platelet-derived growth factor receptor, alpha polypeptide                                 | protein kinase (RTK)    |
| PDGFRB  | 5159   | platelet-derived growth factor receptor, beta polypeptide                                  | protein kinase (RTK)    |
| PDGFRL  | 5157   | platelet-derived growth factor receptor-like;PDGFRL                                        | protein kinase (RTK)    |
| PDIK1L  | 149420 | PDLIM1 interacting kinase 1 like                                                           | protein kinase (NRS/TK) |
| PDK1    | 5163   | pyruvate dehydrogenase kinase, isoenzyme 1                                                 | protein kinase          |
| PDK2    | 5164   | pyruvate dehydrogenase kinase, isoenzyme 2                                                 | protein kinase          |
| PDK3    | 5165   | pyruvate dehydrogenase kinase, isoenzyme 3                                                 | protein kinase          |
| PDK4    | 5166   | pyruvate dehydrogenase kinase, isoenzyme 4                                                 | protein kinase          |
| PDPK1   | 5170   | 3-phosphoinositide dependent protein kinase-1                                              | protein kinase          |
| PDXK    | 8566   | pyridoxal (pyridoxine, vitamin B6) kinase                                                  | kinase related          |
| PFKFB1  | 5207   | 6-phosphofructo-2-kinase/fructose-2,6-bisphosphatase 1                                     | carbohydrate kinase     |
| PFKFB2  | 5208   | 6-phosphofructo-2-kinase/fructose-2,6-bisphosphatase 2                                     | carbohydrate kinase     |
| PFKFB3  | 5209   | 6-phosphofructo-2-kinase/fructose-2,6-bisphosphatase 3                                     | carbohydrate kinase     |
| PFKL    | 5211   | phosphofructokinase, liver                                                                 | carbohydrate kinase     |
| PFKM    | 5213   | phosphofructokinase, muscle                                                                | carbohydrate kinase     |
| PFKP    | 5214   | phosphofructokinase, platelet                                                              | carbohydrate kinase     |
| PFTK1   | 5218   | PFTAIRE protein kinase 1                                                                   | protein kinase (NRS/TK) |
| PGK1    | 5230   | phosphoglycerate kinase 1                                                                  | carbohydrate kinase     |
| PGK2    | 5232   | phosphoglycerate kinase 2                                                                  | carbohydrate kinase     |
| PHKA1   | 5255   | phosphorylase kinase, alpha 1 (muscle)                                                     | protein kinase (NRS/TK) |
| PHKA2   | 5256   | phosphorylase kinase, alpha 2 (liver)                                                      | protein kinase (NRS/TK) |
| PHKB    | 5257   | phosphorylase kinase, beta                                                                 | protein kinase (NRS/TK) |
| PHKG1   | 5260   | phosphorylase kinase, gamma 1 (muscle)                                                     | protein kinase (NRS/TK) |
| PHKG2   | 5261   | phosphorylase kinase, gamma 2 (testis)                                                     | protein kinase (NRS/TK) |
| PI4K2B  | 55300  | phosphatidylinositol 4-kinase type-II beta                                                 | Lipid Kinase            |
| PI4KII  | 55361  | phosphatidylinositol 4-kinase type II                                                      | Lipid Kinase            |
| PIK3C2G | 5288   | phosphoinositide-3-kinase, class 2, gamma polypeptide                                      | Lipid Kinase            |
| PIK3C3  | 5289   | phosphoinositide-3-kinase, class 3                                                         | Lipid Kinase            |
| PIK3CA  | 5290   | phosphoinositide-3-kinase, catalytic, alpha polypeptide                                    | Lipid Kinase            |
| PIK3CB  | 5291   | phosphoinositide-3-kinase, catalytic, beta polypeptide                                     | Lipid Kinase            |
| PIK3CG  | 5294   | phosphoinositide-3-kinase, catalytic, gamma polypeptide                                    | Lipid Kinase            |
| PIK3R1  | 5295   | phosphoinositide-3-kinase, regulatory subunit 1 (p85 alpha)                                | Lipid Kinase            |
| PIK3R3  | 8503   | phosphoinositide-3-kinase, regulatory subunit 3 (p55, gamma)                               | Lipid Kinase            |
| PIK3R4  | 30849  | phosphoinositide-3-kinase, regulatory subunit 4, p150                                      | Lipid Kinase            |
| PIK3R5  | 23533  | phosphoinositide-3-kinase, regulatory subunit 5, p101                                      | Lipid Kinase            |
| PIK4CA  | 5297   | phosphatidylinositol 4-kinase, catalytic, alpha polypeptide                                | Lipid Kinase            |
| PIK4CB  | 5298   | phosphatidylinositol 4-kinase, catalytic, beta polypeptide                                 | Lipid Kinase            |
| PIM1    | 5292   | pim-1 oncogene                                                                             | protein kinase (RS/TK)  |
| PIM2    | 11040  | pim-2 oncogene                                                                             | protein kinase (RS/TK)  |
| PINK1   | 65018  | PTEN induced putative kinase 1                                                             | protein kinase (RS/TK)  |
| PIP5K1A | 8394   | phosphatidylinositol-4-phosphate 5-kinase, type I, alpha                                   | Lipid Kinase            |
| PIP5K1B | 8395   | phosphatidylinositol-4-phosphate 5-kinase, type I, beta                                    | Lipid Kinase            |
| PIP5K2A | 5305   | phosphatidylinositol-4-phosphate 5-kinase, type II, alpha                                  | Lipid Kinase            |
| PIP5K2C | 79837  | phosphatidylinositol-4-phosphate 5-kinase, type II, gamma                                  | kinase related          |
| PIP5K3  | 200576 | phosphatidylinositol-3-phosphate/phosphatidylinositol 5-kinase, type III                   | Lipid Kinase            |
| PIP5KL1 | 138429 | phosphatidylinositol-4-phosphate 5-kinase-like 1                                           | Lipid Kinase            |
| PKLR    | 5313   | pyruvate kinase, liver and RBC                                                             | carbohydrate kinase     |
| PKM2    | 5315   | pyruvate kinase, muscle                                                                    | carbohydrate kinase     |
| PKMYT1  | 9088   | membrane-associated tyrosine- and threonine-specific cdc2-inhibitory kinase                | protein kinase (NRS/TK) |
| PLAU    | 5328   | plasminogen activator, urokinase                                                           | kinase related          |
| PLK1    | 5347   | polo-like kinase 1 (Drosophila)                                                            | protein kinase (NRS/TK) |
| PLK2    | 10769  | polo-like kinase 2 (Drosophila)                                                            | protein kinase (NRS/TK) |
| PLK4    | 10733  | polo-like kinase 4 (Drosophila)                                                            | protein kinase (NRS/TK) |
| PLXNA3  | 55558  | plexin A3;PLXNA3                                                                           | protein kinase (RTK)    |
| PLXNA4B | 91584  | plexin A4, B;PLXNA4B                                                                       | protein kinase (RTK)    |
| PLXNB2  | 23654  | plexin B2;PLXNB2                                                                           | protein kinase (RTK)    |
| PMVK    | 10654  | phosphomevalonate kinase                                                                   | kinase related          |
| PNCK    | 139728 | pregnancy upregulated non-ubiquitously expressed CaM kinase                                | protein kinase (NRS/TK) |
| PNKP    | 11284  | polynucleotide kinase 3'-phosphatase                                                       | nucleotide kinase       |
| PRKAA1  | 5562   | protein kinase, AMP-activated, alpha 1 catalytic subunit                                   | protein kinase (NRS/TK) |
| PRKAA2  | 5563   | protein kinase, AMP-activated, alpha 2 catalytic subunit                                   | protein kinase (NRS/TK) |
| PRKAB1  | 5564   | protein kinase, AMP-activated, beta 1 non-catalytic subunit                                | protein kinase (NRS/TK) |
| PRKAB2  | 5565   | protein kinase, AMP-activated, beta 2 non-catalytic subunit                                | protein kinase (NRS/TK) |
| PRKACA  | 5566   | protein kinase, cAMP-dependent, catalytic, alpha                                           | protein kinase (NRS/TK) |
| PRKACB  | 5567   | protein kinase, cAMP-dependent, catalytic, beta                                            | protein kinase (NRS/TK) |
| PRKACG  | 5568   | protein kinase, cAMP-dependent, catalytic, gamma                                           | protein kinase (NRS/TK) |
| PRKAG1  | 5571   | protein kinase, AMP-activated, gamma 1 non-catalytic subunit                               | protein kinase (NRS/TK) |
| PRKAG2  | 51422  | protein kinase, AMP-activated, gamma 2 non-catalytic subunit                               | protein kinase (NRS/TK) |
| PRKAG3  | 53632  | protein kinase, AMP-activated, gamma 3 non-catalytic subunit                               | protein kinase (NRS/TK) |
| PRKAR1A | 5573   | protein kinase, cAMP-dependent, regulatory, type I, alpha (tissue specific extinguisher 1) | protein kinase (NRS/TK) |
| PRKAR1B | 5575   | protein kinase, cAMP-dependent, regulatory, type I, beta                                   | protein kinase (NRS/TK) |
| PRKAR2A | 5576   | protein kinase, cAMP-dependent, regulatory, type II, alpha                                 | protein kinase (NRS/TK) |
| PRKAR2B | 5577   | protein kinase, cAMP-dependent, regulatory, type II, beta                                  | protein kinase (NRS/TK) |
| PRKCA   | 5578   | protein kinase C, alpha                                                                    | protein kinase (NRS/TK) |
| PRKCB1  | 5579   | protein kinase C, beta 1                                                                   | protein kinase (NRS/TK) |
| PRKCE   | 5581   | protein kinase C, epsilon                                                                  | protein kinase (NRS/TK) |
| PRKCG   | 5582   | protein kinase C, gamma                                                                    | protein kinase (NRS/TK) |
| PRKCH   | 5583   | protein kinase C, eta                                                                      | protein kinase (NRS/TK) |
| PRKCI   | 5584   | protein kinase C, iota                                                                     | protein kinase (NRS/TK) |
| PRKCQ   | 5588   | protein kinase C, theta                                                                    | protein kinase (NRS/TK) |
| PRKCZ   | 5590   | protein kinase C, zeta                                                                     | protein kinase (NRS/TK) |
| PRKD1   | 5587   | protein kinase D1                                                                          | protein kinase (NRS/TK) |
| PRKD2   | 25865  | protein kinase D2                                                                          | protein kinase (NRS/TK) |
| PRKD3   | 23683  | protein kinase D3                                                                          | protein kinase (NRS/TK) |
| PRKG1   | 5592   | protein kinase, cGMP-dependent, type I                                                     | protein kinase (NRS/TK) |
| PRKG2   | 5593   | protein kinase, cGMP-dependent, type II                                                    | protein kinase (NRS/TK) |



|              |        |                                                                                                           |                         |
|--------------|--------|-----------------------------------------------------------------------------------------------------------|-------------------------|
| PRKR         | 5610   | protein kinase, interferon-inducible double stranded RNA dependent                                        | protein kinase (NRS/TK) |
| PRKX         | 5613   | protein kinase, X-linked                                                                                  | protein kinase (NRS/TK) |
| PRKY         | 5616   | protein kinase, Y-linked                                                                                  | protein kinase (NRS/TK) |
| PRPF4B       | 8899   | PRP4 pre-mRNA processing factor 4 homolog B (yeast)                                                       | protein kinase (NRS/TK) |
| PRPS1        | 5631   | phosphoribosyl pyrophosphate synthetase 1;PRPS1                                                           | kinase related          |
| PRPS1L1      | 221823 | phosphoribosyl pyrophosphate synthetase 1-like 1;PRPS1L1                                                  | kinase related          |
| PRPS2        | 5634   | phosphoribosyl pyrophosphate synthetase 2;PRPS2                                                           | kinase related          |
| PSKH1        | 5681   | protein serine kinase H1                                                                                  | protein kinase (NRS/TK) |
| PTK2         | 5747   | PTK2 protein tyrosine kinase 2                                                                            | protein kinase (NRTK)   |
| PTK2B        | 2185   | PTK2B protein tyrosine kinase 2 beta                                                                      | protein kinase (NRTK)   |
| PTK6         | 5753   | PTK6 protein tyrosine kinase 6                                                                            | protein kinase (NRTK)   |
| PTK7         | 5754   | PTK7 protein tyrosine kinase 7                                                                            | protein kinase (RTK)    |
| PTK9         | 5756   | PTK9 protein tyrosine kinase 9                                                                            | protein kinase (NRTK)   |
| PXK          | 54899  | PX domain containing serine/threonine kinase                                                              | kinase related          |
| RAF1         | 5894   | v-raf-1 murine leukemia viral oncogene homolog 1                                                          | protein kinase (NRS/TK) |
| RAGE         | 5891   | renal tumor antigen                                                                                       | protein kinase (NRS/TK) |
| RBKS         | 64080  | ribokinase                                                                                                | nucleotide kinase       |
| RET          | 5979   | ret proto-oncogene (multiple endocrine neoplasia and medullary thyroid carcinoma 1, Hirschsprung disease) | protein kinase (RTK)    |
| RFK          | 55312  | riboflavin kinase                                                                                         | kinase related          |
| RIOK1        | 83732  | RIO kinase 1 (yeast)                                                                                      | protein kinase (NRS/TK) |
| RIOK2        | 55781  | RIO kinase 2 (yeast)                                                                                      | protein kinase (NRS/TK) |
| RIOK3        | 8780   | RIO kinase 3 (yeast)                                                                                      | protein kinase (NRS/TK) |
| RIPK1        | 8737   | receptor (TNFRSF)-interacting serine-threonine kinase 1                                                   | protein kinase (NRS/TK) |
| RIPK2        | 8767   | receptor-interacting serine-threonine kinase 2                                                            | protein kinase (NRS/TK) |
| RIPK5        | 25778  | receptor-interacting protein kinase 5                                                                     | protein kinase (NRS/TK) |
| RKHD3        | 84206  | ring finger and KH domain containing 3;RKHD3                                                              | protein kinase          |
| ROR2         | 4920   | receptor tyrosine kinase-like orphan receptor 2                                                           | protein kinase (RTK)    |
| RP2          | 6102   | retinitis pigmentosa 2 (X-linked recessive);RP2                                                           | nucleotide kinase       |
| RP6-213H19.1 | 51765  | Mst3 and SOK1-related kinase                                                                              | protein kinase          |
| RPS6KA1      | 6195   | ribosomal protein S6 kinase, 90kDa, polypeptide 1                                                         | protein kinase (NRS/TK) |
| RPS6KA2      | 6196   | ribosomal protein S6 kinase, 90kDa, polypeptide 2                                                         | protein kinase (NRS/TK) |
| RPS6KA3      | 6197   | ribosomal protein S6 kinase, 90kDa, polypeptide 3                                                         | protein kinase (NRS/TK) |
| RPS6KA4      | 8986   | ribosomal protein S6 kinase, 90kDa, polypeptide 4                                                         | protein kinase (NRS/TK) |
| RPS6KA5      | 9252   | ribosomal protein S6 kinase, 90kDa, polypeptide 5                                                         | protein kinase (NRS/TK) |
| RPS6KA6      | 27330  | ribosomal protein S6 kinase, 90kDa, polypeptide 6                                                         | protein kinase (NRS/TK) |
| RPS6KB1      | 6198   | ribosomal protein S6 kinase, 70kDa, polypeptide 1                                                         | protein kinase (NRS/TK) |
| RPS6KB2      | 6199   | ribosomal protein S6 kinase, 70kDa, polypeptide 2                                                         | protein kinase (NRS/TK) |
| RPS6KC1      | 26750  | ribosomal protein S6 kinase, 52kDa, polypeptide 1                                                         | protein kinase (NRS/TK) |
| RPS6KL1      | 83694  | ribosomal protein S6 kinase-like 1                                                                        | protein kinase (NRS/TK) |
| SCYL1        | 57410  | SCY1-like 1 (S. cerevisiae)                                                                               | protein kinase (NRTK)   |
| SCYL2        | 55681  | hypothetical protein FLJ10074                                                                             | protein kinase (NRTK)   |
| SCYL3        | 57147  | ezrin-binding partner PACE-1                                                                              | protein kinase (NRTK)   |
| SEPHS2       | 22928  | selenophosphate synthetase 2;SEPHS2                                                                       | kinase related          |
| SGK          | 6446   | serum/glucocorticoid regulated kinase                                                                     | protein kinase (NRS/TK) |
| SGK2         | 10110  | serum/glucocorticoid regulated kinase 2                                                                   | protein kinase (NRS/TK) |
| SGK3         | 23678  | serum/glucocorticoid regulated kinase-like                                                                | protein kinase (NRS/TK) |
| SH3BP4       | 23677  | SH3-domain binding protein 4;SH3BP4                                                                       | protein kinase (NRTK)   |
| SH3BP5       | 9467   | SH3-domain binding protein 5 (BTK-associated);SH3BP5                                                      | kinase related          |
| SH3BP5L      | 80851  | SH3-binding domain protein 5-like;SH3BP5L                                                                 | kinase related          |
| SLAMF6       | 114836 | SLAM family member 6;SLAMF6                                                                               | protein kinase (RTK)    |
| SNF1LK       | 150094 | SNF1-like kinase                                                                                          | protein kinase (NRS/TK) |
| SNRK         | 54861  | SNF-1 related kinase                                                                                      | protein kinase (NRS/TK) |
| SNX16        | 64089  | sorting nexin 16;SNX16                                                                                    | kinase related          |
| SPHK1        | 8877   | sphingosine kinase 1                                                                                      | carbohydrate kinase     |
| SPHK2        | 56848  | sphingosine kinase 2                                                                                      | carbohydrate kinase     |
| SRC          | 6714   | v-src sarcoma (Schmidt-Ruppin A-2) viral oncogene homolog (avian)                                         | protein kinase (NRTK)   |
| SRPK1        | 6732   | SFRS protein kinase 1                                                                                     | protein kinase (NRS/TK) |
| SRPK2        | 6733   | SFRS protein kinase 2                                                                                     | protein kinase (NRS/TK) |
| SRPK3        | 26576  | serine/threonine kinase 23                                                                                | protein kinase (NRS/TK) |
| STK11        | 6794   | serine/threonine kinase 11 (Peutz-Jeghers syndrome)                                                       | protein kinase (NRS/TK) |
| STK16        | 8576   | serine/threonine kinase 16                                                                                | protein kinase (NRS/TK) |
| STK17B       | 9262   | serine/threonine kinase 17b (apoptosis-inducing)                                                          | protein kinase (NRS/TK) |
| STK19        | 8859   | serine/threonine kinase 19                                                                                | protein kinase (NRS/TK) |
| STK24        | 8428   | serine/threonine kinase 24 (STE20 homolog, yeast)                                                         | protein kinase          |
| STK25        | 10494  | serine/threonine kinase 25 (STE20 homolog, yeast)                                                         | protein kinase          |
| STK3         | 6788   | serine/threonine kinase 3 (STE20 homolog, yeast)                                                          | protein kinase          |
| STK32A       | 202374 | serine/threonine kinase 32A                                                                               | protein kinase (NRS/TK) |
| STK32B       | 55351  | serine/threonine kinase 32B                                                                               | protein kinase (NRS/TK) |
| STK32C       | 282974 | serine/threonine kinase 32C                                                                               | protein kinase (NRS/TK) |
| STK33        | 65975  | serine/threonine kinase 33                                                                                | protein kinase (NRS/TK) |
| STK36        | 27148  | serine/threonine kinase 36 (fused homolog, Drosophila)                                                    | protein kinase (RS/TK)  |
| STK38        | 11329  | serine/threonine kinase 38                                                                                | protein kinase (NRS/TK) |
| STK38L       | 23012  | serine/threonine kinase 38 like                                                                           | protein kinase (NRS/TK) |
| STK40        | 83931  | Ser/Thr-like kinase                                                                                       | protein kinase          |
| STYK1        | 55359  | protein kinase STYK1                                                                                      | protein kinase (RTK)    |
| SYK          | 6850   | spleen tyrosine kinase                                                                                    | protein kinase (NRTK)   |
| TAOK3        | 51347  | TAO kinase 3                                                                                              | protein kinase          |
| TBK1         | 29110  | TANK-binding kinase 1                                                                                     | protein kinase (NRS/TK) |
| TEC          | 7006   | tec protein tyrosine kinase                                                                               | protein kinase (NRTK)   |
| TESK1        | 7016   | testis-specific kinase 1                                                                                  | protein kinase (NRS/TK) |
| TESK2        | 10420  | testis-specific kinase 2                                                                                  | protein kinase (NRS/TK) |
| TGFBR1       | 7046   | transforming growth factor, beta receptor I (activin A receptor type II-like kinase, 53kDa)               | protein kinase (NRS/TK) |
| TGFBR2       | 7048   | transforming growth factor, beta receptor II (70/80kDa)                                                   | protein kinase (RS/TK)  |
| TGFBR3       | 7049   | transforming growth factor, beta receptor III (betaglycan, 300kDa);TGFBR3                                 | protein kinase (RS/TK)  |
| TIE1         | 7075   | tyrosine kinase with immunoglobulin-like and EGF-like domains 1                                           | protein kinase (RTK)    |
| TK1          | 7083   | thymidine kinase 1, soluble                                                                               | nucleotide kinase       |
| TLK1         | 9874   | tousled-like kinase 1                                                                                     | protein kinase (NRS/TK) |
| TLK2         | 11011  | tousled-like kinase 2                                                                                     | protein kinase (NRS/TK) |
| TNK1         | 8711   | tyrosine kinase, non-receptor, 1                                                                          | protein kinase (NRTK)   |
| TNNI3K       | 51086  | TNNI3 interacting kinase                                                                                  | protein kinase          |
| TP53RK       | 112858 | TP53 regulating kinase                                                                                    | protein kinase (NRS/TK) |
| TPK1         | 27010  | thiamin pyrophosphokinase 1                                                                               | kinase related          |
| TPR          | 7175   | translocated promoter region (to activated MET oncogene);TPR                                              | protein kinase (RTK)    |
| TRIB1        | 10221  | tribbles homolog 1 (Drosophila)                                                                           | protein kinase          |
| TRIB2        | 28951  | tribbles homolog 2 (Drosophila)                                                                           | protein kinase          |
| TRIB3        | 57761  | tribbles homolog 3 (Drosophila)                                                                           | protein kinase          |

|                 |        |                                                                    |                         |
|-----------------|--------|--------------------------------------------------------------------|-------------------------|
| <i>TRIM27</i>   | 5987   | tripartite motif-containing 27;TRIM27                              | protein kinase (RTK)    |
| <i>TRPM7</i>    | 54822  | transient receptor potential cation channel, subfamily M, member 7 | protein kinase (NRS/TK) |
| <i>TSSK1</i>    | 83942  | serine/threonine kinase 22D (spermiogenesis associated)            | protein kinase (NRS/TK) |
| <i>TSSK2</i>    | 23617  | serine/threonine kinase 22B (spermiogenesis associated)            | protein kinase (NRS/TK) |
| <i>TSSK3</i>    | 81629  | serine/threonine kinase 22C (spermiogenesis associated)            | protein kinase (NRS/TK) |
| <i>TSSK6</i>    | 83983  | serine/threonine protein kinase SSTK                               | protein kinase (NRS/TK) |
| <i>TTK</i>      | 7272   | TTK protein kinase                                                 | protein kinase          |
| <i>TWf2</i>     | 11344  | PTK9L protein tyrosine kinase 9-like (A6-related protein)          | protein kinase (NRTK)   |
| <i>TXK</i>      | 7294   | TXK tyrosine kinase                                                | protein kinase (NRTK)   |
| <i>TXNDC3</i>   | 51314  | thioredoxin domain containing 3 (spermatozoa);TXNDC3               | nucleotide kinase       |
| <i>TYK2</i>     | 7297   | tyrosine kinase 2                                                  | protein kinase (NRTK)   |
| <i>TYRO3</i>    | 7301   | TYRO3 protein tyrosine kinase                                      | protein kinase (RTK)    |
| <i>UCK2</i>     | 7371   | uridine-cytidine kinase 2                                          | nucleotide kinase       |
| <i>UHMK1</i>    | 127933 | U2AF homology motif (UHM) kinase 1                                 | protein kinase (NRS/TK) |
| <i>ULK2</i>     | 9706   | unc-51-like kinase 2 (C. elegans)                                  | protein kinase (NRS/TK) |
| <i>ULK3</i>     | 25989  | DKFZP434C131 protein                                               | protein kinase (NRS/TK) |
| <i>ULK4</i>     | 54986  | hypothetical protein FLJ20574                                      | protein kinase          |
| <i>VRK1</i>     | 7443   | vaccinia related kinase 1                                          | protein kinase (NRS/TK) |
| <i>VRK2</i>     | 7444   | vaccinia related kinase 2                                          | protein kinase (NRS/TK) |
| <i>VRK3</i>     | 51231  | vaccinia related kinase 3                                          | protein kinase (NRS/TK) |
| <i>WNK1</i>     | 65125  | protein kinase, lysine deficient 1                                 | protein kinase (NRS/TK) |
| <i>WNK4</i>     | 65266  | protein kinase, lysine deficient 4                                 | protein kinase (NRS/TK) |
| <i>XRCC6BP1</i> | 91419  | XRCC6 binding protein 1;XRCC6BP1                                   | protein kinase          |
| <i>XYLB</i>     | 9942   | xylulokinase homolog (H. influenzae)                               | carbohydrate kinase     |
| <i>YES1</i>     | 7525   | v-yes-1 Yamaguchi sarcoma viral oncogene homolog 1                 | protein kinase (NRTK)   |
| <i>YSK4</i>     | 80122  | hypothetical protein FLJ23074                                      | protein kinase          |
| <i>ZAK</i>      | 51776  | sterile alpha motif and leucine zipper containing kinase AZK       | protein kinase (NRS/TK) |
| <i>ZAP70</i>    | 7535   | zeta-chain (TCR) associated protein kinase 70kDa                   | protein kinase (NRTK)   |

**Supplementary Table 2:** Ranking of average differential proliferation (1  $\mu$ M PLX4720/control) for 597 kinase-related ORFs, relative to MEK DD

| RANK | GENE      | AVERAGE | STDEV. | Z-SCORE | NOTES         |
|------|-----------|---------|--------|---------|---------------|
| -    | ALL ORFS  | 44.26%  | 7.19%  | -       |               |
| 1    | MEK DD    | 100.00% | 6.54%  | 7.75    | (+) Control   |
| 2    | RAF1      | 86.80%  | 18.00% | 5.92    |               |
| 3    | PRKCE     | 74.76%  | 8.78%  | 4.24    |               |
| 4    | MAP3K8    | 67.51%  | 10.03% | 3.23    |               |
| 5    | PRKCH     | 67.37%  | 17.56% | 3.21    |               |
| 6    | FGR       | 65.03%  | 20.76% | 2.89    |               |
| 7    | CRKL      | 64.74%  | 19.66% | 2.85    |               |
| 8    | PAK3      | 60.33%  | 13.59% | 2.23    |               |
| 9    | AXL       | 59.75%  | 10.23% | 2.15    |               |
| 10   | LCK       | 59.47%  | 15.66% | 2.11    | Lethal        |
| 11   | ERBB2     | 59.32%  | 9.39%  | 2.09    | 2 SD = 58.64% |
| 12   | PRKCQ     | 55.40%  | 11.97% | 1.55    |               |
| 13   | NME3      | 55.10%  | 15.46% | 1.51    |               |
| 14   | MOS       | 55.04%  | 11.84% | 1.50    |               |
| 15   | KHK       | 55.03%  | 14.75% | 1.50    |               |
| 16   | TIE1      | 54.65%  | 15.26% | 1.44    | Proliferative |
| 17   | PRKAG2    | 54.23%  | 7.15%  | 1.39    |               |
| 18   | LOC91461  | 53.75%  | 12.45% | 1.32    |               |
| 19   | TYRO3     | 53.64%  | 10.57% | 1.30    |               |
| 20   | CDK3      | 53.55%  | 13.92% | 1.29    |               |
| 21   | PIM2      | 53.36%  | 10.78% | 1.27    |               |
| 22   | CIB4      | 53.31%  | 12.21% | 1.26    |               |
| 23   | PRPS2     | 53.24%  | 14.53% | 1.25    |               |
| 24   | PRKCB1    | 53.12%  | 7.74%  | 1.23    |               |
| 25   | ACVR1B    | 53.08%  | 9.53%  | 1.23    |               |
| 26   | ETNK2     | 52.85%  | 12.63% | 1.19    |               |
| 27   | STK36     | 52.85%  | 15.28% | 1.19    |               |
| 28   | DDR1      | 52.78%  | 15.54% | 1.19    |               |
| 29   | PRKCA     | 52.47%  | 13.38% | 1.14    |               |
| 30   | AURKB     | 52.22%  | 11.80% | 1.11    |               |
| 31   | CAMK4     | 52.14%  | 9.09%  | 1.10    |               |
| 32   | DAPK1     | 51.94%  | 11.43% | 1.07    |               |
| 33   | AURKC     | 51.89%  | 11.23% | 1.06    | Proliferative |
| 34   | IGF1R     | 51.35%  | 10.70% | 0.99    |               |
| 35   | FN3K      | 51.27%  | 12.65% | 0.97    |               |
| 36   | LOC646505 | 50.97%  | 16.89% | 0.93    |               |
| 37   | PIK3CB    | 50.90%  | 12.87% | 0.92    |               |
| 38   | YES1      | 50.68%  | 9.51%  | 0.89    |               |
| 39   | LOC340156 | 50.59%  | 14.63% | 0.88    |               |
| 40   | MAP4K5    | 50.57%  | 35.45% | 0.88    |               |
| 41   | ABL1      | 50.55%  | 19.09% | 0.87    |               |
| 42   | MAP2K1IP1 | 50.47%  | 11.54% | 0.86    |               |
| 43   | PRKAR1B   | 50.34%  | 8.31%  | 0.84    |               |
| 44   | RPS6KA1   | 50.12%  | 12.28% | 0.81    |               |
| 45   | TSSK6     | 50.10%  | 11.70% | 0.81    |               |
| 46   | NEK9      | 50.04%  | 14.37% | 0.80    |               |
| 47   | DLG1      | 49.98%  | 12.07% | 0.80    |               |
| 48   | PTK6      | 49.93%  | 10.93% | 0.79    |               |
| 49   | SCYL2     | 49.85%  | 12.51% | 0.78    |               |
| 50   | STK11     | 49.82%  | 12.10% | 0.77    |               |
| 51   | C9orf98   | 49.82%  | 10.38% | 0.77    |               |
| 52   | PCK2      | 49.77%  | 12.93% | 0.77    |               |
| 53   | NTRK2     | 49.77%  | 10.02% | 0.77    |               |

|     |                  |        |        |      |               |
|-----|------------------|--------|--------|------|---------------|
| 54  | <i>TRIM27</i>    | 49.69% | 10.38% | 0.75 |               |
| 55  | <i>FN3KRP</i>    | 49.69% | 11.83% | 0.75 |               |
| 56  | <i>CAMK2D</i>    | 49.61% | 11.93% | 0.74 |               |
| 57  | <i>ALPK2</i>     | 49.56% | 10.41% | 0.74 |               |
| 58  | <i>LOC652722</i> | 49.52% | 13.10% | 0.73 |               |
| 59  | <i>LATS2</i>     | 49.49% | 12.45% | 0.73 |               |
| 60  | <i>STK3</i>      | 49.48% | 10.15% | 0.73 |               |
| 61  | <i>CDC42BPG</i>  | 49.44% | 10.19% | 0.72 |               |
| 62  | <i>HKDC1</i>     | 49.44% | 11.53% | 0.72 |               |
| 63  | <i>CDK7</i>      | 49.42% | 14.45% | 0.72 | Proliferative |
| 64  | <i>WNK4</i>      | 49.37% | 14.07% | 0.71 |               |
| 65  | <i>PRPF4B</i>    | 49.36% | 12.18% | 0.71 |               |
| 66  | <i>MAPKAPK2</i>  | 49.30% | 12.83% | 0.70 |               |
| 67  | <i>MEK WT</i>    | 49.29% | 14.33% | 0.70 | (-) Control   |
| 68  | <i>PRPS1</i>     | 49.28% | 12.09% | 0.70 |               |
| 69  | <i>BTK</i>       | 49.22% | 14.59% | 0.69 |               |
| 70  | <i>MYO3B</i>     | 49.19% | 11.05% | 0.69 |               |
| 71  | <i>TESK1</i>     | 49.18% | 12.19% | 0.68 |               |
| 72  | <i>PLXNA3</i>    | 49.11% | 9.04%  | 0.67 |               |
| 73  | <i>CLK2</i>      | 49.09% | 8.01%  | 0.67 |               |
| 74  | <i>PFKFB1</i>    | 49.02% | 14.04% | 0.66 |               |
| 75  | <i>DAK</i>       | 49.00% | 12.68% | 0.66 |               |
| 76  | <i>ITPKB</i>     | 48.99% | 16.62% | 0.66 |               |
| 77  | <i>CHEK1</i>     | 48.98% | 14.41% | 0.66 |               |
| 78  | <i>MERTK</i>     | 48.94% | 12.88% | 0.65 |               |
| 79  | <i>IKBKE</i>     | 48.83% | 12.46% | 0.63 |               |
| 80  | <i>CARD11</i>    | 48.83% | 15.02% | 0.63 |               |
| 81  | <i>PANK3</i>     | 48.78% | 9.70%  | 0.63 |               |
| 82  | <i>TRIB2</i>     | 48.76% | 10.71% | 0.63 |               |
| 83  | <i>CDC7</i>      | 48.74% | 9.83%  | 0.62 |               |
| 84  | <i>PIK3C3</i>    | 48.69% | 12.05% | 0.62 |               |
| 85  | <i>LRGUK</i>     | 48.60% | 11.29% | 0.60 |               |
| 86  | <i>SCYL3</i>     | 48.58% | 10.86% | 0.60 |               |
| 87  | <i>MAP3K14</i>   | 48.57% | 8.10%  | 0.60 |               |
| 88  | <i>LOC730000</i> | 48.57% | 13.36% | 0.60 |               |
| 89  | <i>LOC442075</i> | 48.55% | 10.75% | 0.60 |               |
| 90  | <i>LOC54103</i>  | 48.50% | 10.77% | 0.59 |               |
| 91  | <i>NPR2</i>      | 48.49% | 13.29% | 0.59 |               |
| 92  | <i>COL4A3BP</i>  | 48.49% | 11.10% | 0.59 |               |
| 93  | <i>MYLK2</i>     | 48.49% | 11.83% | 0.59 |               |
| 94  | <i>CSNK2B</i>    | 48.48% | 11.52% | 0.59 |               |
| 95  | <i>CARKL</i>     | 48.47% | 9.19%  | 0.58 |               |
| 96  | <i>TP53RK</i>    | 48.44% | 14.25% | 0.58 | Proliferative |
| 97  | <i>PRKCG</i>     | 48.42% | 8.31%  | 0.58 |               |
| 98  | <i>ALK</i>       | 48.39% | 14.07% | 0.57 |               |
| 99  | <i>ETNK1</i>     | 48.37% | 11.25% | 0.57 |               |
| 100 | <i>DYRK2</i>     | 48.36% | 11.80% | 0.57 |               |
| 101 | <i>DGKA</i>      | 48.31% | 10.71% | 0.56 |               |
| 102 | <i>ADPGK</i>     | 48.30% | 13.36% | 0.56 |               |
| 103 | <i>PRKAB2</i>    | 48.29% | 10.75% | 0.56 |               |
| 104 | <i>ULK3</i>      | 48.28% | 11.18% | 0.56 |               |
| 105 | <i>KIAA2002</i>  | 48.28% | 12.39% | 0.56 |               |
| 106 | <i>IRAK3</i>     | 48.26% | 10.96% | 0.56 |               |
| 107 | <i>TYK2</i>      | 48.24% | 10.88% | 0.55 |               |
| 108 | <i>MAP2K7</i>    | 48.23% | 12.06% | 0.55 |               |
| 109 | <i>NRBP</i>      | 48.18% | 13.40% | 0.54 |               |
| 110 | <i>CDK2</i>      | 48.14% | 14.65% | 0.54 |               |
| 111 | <i>MORN2</i>     | 47.98% | 11.36% | 0.52 |               |
| 112 | <i>EPHB4</i>     | 47.92% | 12.52% | 0.51 |               |

|     |                  |        |        |      |               |
|-----|------------------|--------|--------|------|---------------|
| 113 | <i>PRKCZ</i>     | 47.88% | 12.68% | 0.50 |               |
| 114 | <i>RFK</i>       | 47.85% | 10.44% | 0.50 |               |
| 115 | <i>RAGE</i>      | 47.83% | 10.46% | 0.50 |               |
| 116 | <i>LOC91807</i>  | 47.80% | 11.25% | 0.49 |               |
| 117 | <i>PIK3CG</i>    | 47.76% | 11.25% | 0.49 |               |
| 118 | <i>PIK3C2G</i>   | 47.74% | 10.75% | 0.48 |               |
| 119 | <i>ARSG</i>      | 47.71% | 10.26% | 0.48 |               |
| 120 | <i>CSNK1A1L</i>  | 47.66% | 10.26% | 0.47 |               |
| 121 | <i>ALS2CR7</i>   | 47.65% | 11.56% | 0.47 |               |
| 122 | <i>FLJ40852</i>  | 47.62% | 12.34% | 0.47 |               |
| 123 | <i>LOC390877</i> | 47.61% | 11.43% | 0.46 |               |
| 124 | <i>TRIB1</i>     | 47.59% | 12.91% | 0.46 |               |
| 125 | <i>TPR</i>       | 47.58% | 13.00% | 0.46 |               |
| 126 | <i>RPS6KL1</i>   | 47.57% | 12.33% | 0.46 |               |
| 127 | <i>CCRK</i>      | 47.56% | 10.28% | 0.46 |               |
| 128 | <i>PDPK1</i>     | 47.53% | 10.42% | 0.45 |               |
| 129 | <i>FASTKD5</i>   | 47.52% | 10.70% | 0.45 |               |
| 130 | <i>CDKL3</i>     | 47.49% | 13.14% | 0.45 |               |
| 131 | <i>DTYMK</i>     | 47.49% | 10.60% | 0.45 |               |
| 132 | <i>MPP3</i>      | 47.47% | 10.65% | 0.45 |               |
| 133 | <i>HSPB8</i>     | 47.46% | 11.73% | 0.44 |               |
| 134 | <i>NME6</i>      | 47.44% | 14.48% | 0.44 |               |
| 135 | <i>NEK3</i>      | 47.42% | 15.46% | 0.44 |               |
| 136 | <i>PIK3R4</i>    | 47.41% | 11.14% | 0.44 |               |
| 137 | <i>MGC16169</i>  | 47.41% | 13.90% | 0.44 |               |
| 138 | <i>OXSRI</i>     | 47.40% | 11.68% | 0.44 |               |
| 139 | <i>MASTL</i>     | 47.35% | 10.28% | 0.43 |               |
| 140 | <i>PNCK</i>      | 47.35% | 10.15% | 0.43 |               |
| 141 | <i>ADCK2</i>     | 47.32% | 15.57% | 0.43 |               |
| 142 | <i>SNX16</i>     | 47.26% | 12.76% | 0.42 |               |
| 143 | <i>HCK</i>       | 47.24% | 23.41% | 0.41 |               |
| 144 | <i>CDKL2</i>     | 47.21% | 10.60% | 0.41 |               |
| 145 | <i>NEK11</i>     | 47.20% | 14.68% | 0.41 |               |
| 146 | <i>BMP2K</i>     | 47.15% | 11.18% | 0.40 |               |
| 147 | <i>BUB1</i>      | 47.15% | 11.76% | 0.40 |               |
| 148 | <i>PINK1</i>     | 47.13% | 11.38% | 0.40 |               |
| 149 | <i>RBKS</i>      | 47.08% | 8.73%  | 0.39 |               |
| 150 | <i>LOC732306</i> | 47.03% | 8.82%  | 0.39 |               |
| 151 | <i>PKLR</i>      | 47.03% | 12.10% | 0.38 |               |
| 152 | <i>DYRK1A</i>    | 47.01% | 12.69% | 0.38 |               |
| 153 | <i>RPS6KA4</i>   | 47.01% | 11.70% | 0.38 |               |
| 154 | <i>DGKG</i>      | 46.94% | 12.71% | 0.37 |               |
| 155 | <i>CDK5R1</i>    | 46.93% | 9.40%  | 0.37 |               |
| 156 | <i>FLJ25006</i>  | 46.87% | 11.64% | 0.36 |               |
| 157 | <i>PBK</i>       | 46.86% | 14.05% | 0.36 |               |
| 158 | <i>ACVR1C</i>    | 46.82% | 9.98%  | 0.35 |               |
| 159 | <i>FLT1</i>      | 46.78% | 10.42% | 0.35 |               |
| 160 | <i>PLXNA4B</i>   | 46.76% | 9.39%  | 0.35 |               |
| 161 | <i>MVK</i>       | 46.71% | 9.26%  | 0.34 |               |
| 162 | <i>LIMK2</i>     | 46.70% | 11.29% | 0.34 |               |
| 163 | <i>DYRK1B</i>    | 46.68% | 20.75% | 0.34 |               |
| 164 | <i>MARK3</i>     | 46.67% | 11.71% | 0.34 | Proliferative |
| 165 | <i>BMPRI1B</i>   | 46.66% | 12.24% | 0.33 |               |
| 166 | <i>NUP62</i>     | 46.63% | 9.92%  | 0.33 |               |
| 167 | <i>JAK2</i>      | 46.62% | 12.50% | 0.33 |               |
| 168 | <i>MAPK12</i>    | 46.55% | 9.98%  | 0.32 |               |
| 169 | <i>DDR2</i>      | 46.54% | 7.99%  | 0.32 |               |
| 170 | <i>MAK</i>       | 46.52% | 15.42% | 0.31 |               |
| 171 | <i>GLYCTK</i>    | 46.50% | 13.19% | 0.31 |               |

|     |              |        |        |      |  |
|-----|--------------|--------|--------|------|--|
| 172 | AK1          | 46.47% | 9.68%  | 0.31 |  |
| 173 | MAPK15       | 46.47% | 11.14% | 0.31 |  |
| 174 | MAST1        | 46.45% | 10.77% | 0.30 |  |
| 175 | PAPSS2       | 46.39% | 11.53% | 0.30 |  |
| 176 | CSF1R        | 46.34% | 12.86% | 0.29 |  |
| 177 | TPK1         | 46.29% | 9.52%  | 0.28 |  |
| 178 | PAK4         | 46.24% | 9.98%  | 0.28 |  |
| 179 | NAGK         | 46.21% | 12.34% | 0.27 |  |
| 180 | CDK8         | 46.20% | 7.68%  | 0.27 |  |
| 181 | STK40        | 46.19% | 12.92% | 0.27 |  |
| 182 | CIB1         | 46.10% | 10.92% | 0.26 |  |
| 183 | PLK1         | 46.08% | 9.99%  | 0.25 |  |
| 184 | FLJ23356     | 46.04% | 10.45% | 0.25 |  |
| 185 | LOC220686    | 46.04% | 9.31%  | 0.25 |  |
| 186 | PRKAB1       | 46.03% | 12.00% | 0.25 |  |
| 187 | JAK3         | 46.02% | 10.17% | 0.24 |  |
| 188 | NME1         | 46.02% | 13.01% | 0.24 |  |
| 189 | NME5         | 46.00% | 11.53% | 0.24 |  |
| 190 | FER          | 45.97% | 9.92%  | 0.24 |  |
| 191 | AK3L1        | 45.97% | 10.39% | 0.24 |  |
| 192 | PRKG2        | 45.90% | 13.24% | 0.23 |  |
| 193 | RP6-213H19.1 | 45.88% | 12.83% | 0.22 |  |
| 194 | AKT3         | 45.87% | 11.32% | 0.22 |  |
| 195 | PSKH1        | 45.86% | 10.16% | 0.22 |  |
| 196 | PRKAR2B      | 45.84% | 13.05% | 0.22 |  |
| 197 | FUK          | 45.81% | 10.94% | 0.22 |  |
| 198 | ADCK4        | 45.79% | 11.25% | 0.21 |  |
| 199 | TEC          | 45.78% | 11.46% | 0.21 |  |
| 200 | PRKAG1       | 45.77% | 11.08% | 0.21 |  |
| 201 | FXN          | 45.77% | 12.03% | 0.21 |  |
| 202 | AAK1         | 45.68% | 11.49% | 0.20 |  |
| 203 | CAMK2B       | 45.67% | 19.84% | 0.20 |  |
| 204 | COASY        | 45.64% | 11.07% | 0.19 |  |
| 205 | PRKAG3       | 45.63% | 10.21% | 0.19 |  |
| 206 | NME7         | 45.58% | 10.18% | 0.18 |  |
| 207 | LMTK2        | 45.58% | 12.15% | 0.18 |  |
| 208 | PANK2        | 45.57% | 11.72% | 0.18 |  |
| 209 | PRKD3        | 45.47% | 13.14% | 0.17 |  |
| 210 | PHKA2        | 45.47% | 10.92% | 0.17 |  |
| 211 | SLAMF6       | 45.46% | 9.67%  | 0.17 |  |
| 212 | SRPK1        | 45.46% | 12.54% | 0.17 |  |
| 213 | HIPK1        | 45.42% | 12.59% | 0.16 |  |
| 214 | EPHA1        | 45.39% | 10.59% | 0.16 |  |
| 215 | WNK1         | 45.38% | 13.79% | 0.15 |  |
| 216 | PDIK1L       | 45.33% | 12.31% | 0.15 |  |
| 217 | BMP2KL       | 45.33% | 10.08% | 0.15 |  |
| 218 | MAP3K5       | 45.32% | 14.13% | 0.15 |  |
| 219 | EPHA2        | 45.30% | 12.87% | 0.14 |  |
| 220 | CCL2         | 45.29% | 9.71%  | 0.14 |  |
| 221 | CDKL1        | 45.25% | 10.13% | 0.14 |  |
| 222 | NJMU-R1      | 45.23% | 8.13%  | 0.13 |  |
| 223 | LOC652799    | 45.18% | 10.30% | 0.13 |  |
| 224 | GUK1         | 45.15% | 12.23% | 0.12 |  |
| 225 | NME4         | 45.12% | 13.03% | 0.12 |  |
| 226 | YSK4         | 45.11% | 13.47% | 0.12 |  |
| 227 | NEK2         | 45.11% | 9.38%  | 0.12 |  |
| 228 | C9orf95      | 45.10% | 9.38%  | 0.12 |  |
| 229 | CDC2         | 45.05% | 11.95% | 0.11 |  |
| 230 | FGFR2        | 45.01% | 11.23% | 0.10 |  |

|     |                      |        |        |       |            |
|-----|----------------------|--------|--------|-------|------------|
| 231 | <i>IPMK</i>          | 44.98% | 10.67% | 0.10  |            |
| 232 | <i>STK32C</i>        | 44.98% | 12.10% | 0.10  |            |
| 233 | <i>PIP5K2A</i>       | 44.92% | 14.55% | 0.09  |            |
| 234 | <i>PRKX</i>          | 44.90% | 10.44% | 0.09  |            |
| 235 | <i>TRPM7</i>         | 44.80% | 10.36% | 0.07  |            |
| 236 | <i>FLJ10986</i>      | 44.74% | 10.95% | 0.07  |            |
| 237 | <i>SNF1LK</i>        | 44.74% | 12.70% | 0.07  |            |
| 238 | <i>MAP3K6</i>        | 44.71% | 9.75%  | 0.06  |            |
| 239 | <i>LOC653052</i>     | 44.70% | 14.56% | 0.06  |            |
| 240 | <i>IRAK2</i>         | 44.69% | 11.61% | 0.06  |            |
| 241 | <i>XYLB</i>          | 44.68% | 11.47% | 0.06  |            |
| 242 | <i>PTK7</i>          | 44.67% | 14.55% | 0.06  |            |
| 243 | <i>PKMYT1</i>        | 44.66% | 13.74% | 0.05  |            |
| 244 | <i>SPHK2</i>         | 44.63% | 10.35% | 0.05  |            |
| 245 | <i>NME2</i>          | 44.63% | 11.57% | 0.05  |            |
| 246 | <i>PRKAA1</i>        | 44.62% | 15.03% | 0.05  |            |
| 247 | <i>MAPK14</i>        | 44.60% | 10.77% | 0.05  |            |
| 248 | <i>NTRK3</i>         | 44.58% | 13.43% | 0.04  |            |
| 249 | <i>PRKACB</i>        | 44.58% | 9.30%  | 0.04  |            |
| 250 | <i>LOC650122</i>     | 44.56% | 11.24% | 0.04  |            |
| 251 | <i>CDK6</i>          | 44.51% | 10.74% | 0.03  |            |
| 252 | <i>AMHR2</i>         | 44.48% | 11.11% | 0.03  |            |
| 253 | <i>IPPK</i>          | 44.42% | 10.63% | 0.02  |            |
| 254 | <i>AK7</i>           | 44.41% | 10.36% | 0.02  |            |
| 255 | <i>PIP5KL1</i>       | 44.36% | 11.74% | 0.01  |            |
| 256 | <i>LOC340371</i>     | 44.30% | 16.04% | 0.01  |            |
| 257 | <i>DKFZp434B1231</i> | 44.29% | 12.21% | 0.00  |            |
| 258 | <i>PRKAA2</i>        | 44.28% | 11.42% | 0.00  |            |
| 259 | <i>FASTKD1</i>       | 44.28% | 10.73% | 0.00  |            |
| 260 | <i>ARAF</i>          | 44.27% | 14.40% | 0.00  | RAF Family |
| 261 | <i>HK3</i>           | 44.26% | 14.83% | 0.00  |            |
| 262 | <i>KSR2</i>          | 44.25% | 10.28% | 0.00  |            |
| 263 | <i>PAK7</i>          | 44.24% | 18.45% | 0.00  |            |
| 264 | <i>GTF2H1</i>        | 44.23% | 10.90% | 0.00  |            |
| 265 | <i>RPS6KB2</i>       | 44.23% | 9.32%  | -0.01 |            |
| 266 | <i>PAK6</i>          | 44.21% | 13.83% | -0.01 |            |
| 267 | <i>IRAK4</i>         | 44.18% | 10.27% | -0.01 |            |
| 268 | <i>NLK</i>           | 44.18% | 12.92% | -0.01 |            |
| 269 | <i>FYN</i>           | 44.14% | 12.43% | -0.02 |            |
| 270 | <i>BMPR2</i>         | 44.14% | 12.20% | -0.02 |            |
| 271 | <i>CDK4</i>          | 44.13% | 10.47% | -0.02 |            |
| 272 | <i>STK32A</i>        | 44.07% | 13.93% | -0.03 |            |
| 273 | <i>TNK1</i>          | 44.06% | 10.80% | -0.03 |            |
| 274 | <i>STK24</i>         | 43.99% | 10.79% | -0.04 |            |
| 275 | <i>CSNK2A1</i>       | 43.99% | 11.97% | -0.04 |            |
| 276 | <i>AK3</i>           | 43.98% | 11.16% | -0.04 |            |
| 277 | <i>TTK</i>           | 43.93% | 10.47% | -0.05 |            |
| 278 | <i>PGK2</i>          | 43.91% | 13.31% | -0.05 |            |
| 279 | <i>GALK1</i>         | 43.89% | 10.14% | -0.05 |            |
| 280 | <i>DYRK3</i>         | 43.89% | 9.32%  | -0.05 |            |
| 281 | <i>EIF2AK4</i>       | 43.83% | 11.00% | -0.06 |            |
| 282 | <i>PDK1</i>          | 43.79% | 13.31% | -0.07 |            |
| 283 | <i>EIF2AK1</i>       | 43.79% | 12.02% | -0.07 |            |
| 284 | <i>PRKACG</i>        | 43.79% | 11.37% | -0.07 |            |
| 285 | <i>BUB1B</i>         | 43.74% | 10.69% | -0.07 |            |
| 286 | <i>PKM2</i>          | 43.74% | 14.46% | -0.07 |            |
| 287 | <i>LRPPRC</i>        | 43.64% | 10.87% | -0.09 |            |
| 288 | <i>EPHA6</i>         | 43.63% | 12.60% | -0.09 |            |
| 289 | <i>HK2</i>           | 43.58% | 12.55% | -0.10 |            |

|     |                  |        |        |       |            |
|-----|------------------|--------|--------|-------|------------|
| 290 | <i>MET</i>       | 43.55% | 10.99% | -0.10 |            |
| 291 | <i>CKS2</i>      | 43.53% | 7.83%  | -0.10 |            |
| 292 | <i>LOC375133</i> | 43.53% | 10.05% | -0.10 |            |
| 293 | <i>LIMK1</i>     | 43.52% | 12.43% | -0.10 |            |
| 294 | <i>TWF2</i>      | 43.50% | 11.71% | -0.11 |            |
| 295 | <i>PCTK2</i>     | 43.47% | 12.02% | -0.11 |            |
| 296 | <i>DCAKD</i>     | 43.43% | 11.61% | -0.12 |            |
| 297 | <i>PLXNB2</i>    | 43.41% | 11.85% | -0.12 |            |
| 298 | <i>MST1R</i>     | 43.35% | 11.99% | -0.13 |            |
| 299 | <i>PRKAR1A</i>   | 43.35% | 9.03%  | -0.13 |            |
| 300 | <i>SEPHS2</i>    | 43.32% | 9.68%  | -0.13 |            |
| 301 | <i>SPHK1</i>     | 43.31% | 9.87%  | -0.13 |            |
| 302 | <i>CCL4</i>      | 43.30% | 11.83% | -0.13 |            |
| 303 | <i>KIAA0999</i>  | 43.28% | 9.68%  | -0.14 |            |
| 304 | <i>PDGFRL</i>    | 43.23% | 11.93% | -0.14 |            |
| 305 | <i>BRSK1</i>     | 43.21% | 14.17% | -0.15 |            |
| 306 | <i>BRAF</i>      | 43.21% | 12.56% | -0.15 | RAF Family |
| 307 | <i>MUSK</i>      | 43.20% | 11.03% | -0.15 |            |
| 308 | <i>TNNI3K</i>    | 43.20% | 10.46% | -0.15 |            |
| 309 | <i>GK2</i>       | 43.18% | 15.15% | -0.15 |            |
| 310 | <i>CKB</i>       | 43.14% | 9.45%  | -0.16 |            |
| 311 | <i>DGKB</i>      | 43.12% | 11.62% | -0.16 |            |
| 312 | <i>LOC648152</i> | 42.99% | 11.15% | -0.18 |            |
| 313 | <i>RPS6KA5</i>   | 42.87% | 11.23% | -0.19 |            |
| 314 | <i>CASK</i>      | 42.87% | 12.05% | -0.19 |            |
| 315 | <i>PHKA1</i>     | 42.86% | 10.10% | -0.20 |            |
| 316 | <i>AK2</i>       | 42.84% | 9.83%  | -0.20 |            |
| 317 | <i>PIM1</i>      | 42.81% | 14.09% | -0.20 |            |
| 318 | <i>ZAP70</i>     | 42.81% | 12.10% | -0.20 |            |
| 319 | <i>PNKP</i>      | 42.79% | 12.95% | -0.20 |            |
| 320 | <i>CDK10</i>     | 42.78% | 9.77%  | -0.21 |            |
| 321 | <i>CHEK2</i>     | 42.77% | 12.86% | -0.21 |            |
| 322 | <i>CAMK2A</i>    | 42.72% | 11.68% | -0.21 |            |
| 323 | <i>CAMK2G</i>    | 42.70% | 9.66%  | -0.22 |            |
| 324 | <i>ADRBK2</i>    | 42.70% | 12.56% | -0.22 |            |
| 325 | <i>NEK8</i>      | 42.69% | 9.88%  | -0.22 |            |
| 326 | <i>PRKR</i>      | 42.69% | 10.65% | -0.22 |            |
| 327 | <i>CHKA</i>      | 42.66% | 12.84% | -0.22 |            |
| 328 | <i>ACVRL1</i>    | 42.65% | 10.85% | -0.22 |            |
| 329 | <i>PRKY</i>      | 42.63% | 11.80% | -0.23 |            |
| 330 | <i>TRIB3</i>     | 42.62% | 11.45% | -0.23 |            |
| 331 | <i>PRKD2</i>     | 42.59% | 10.48% | -0.23 |            |
| 332 | <i>PIP5K3</i>    | 42.57% | 9.78%  | -0.24 |            |
| 333 | <i>LOC727761</i> | 42.56% | 14.17% | -0.24 |            |
| 334 | <i>PTK2B</i>     | 42.50% | 15.72% | -0.25 |            |
| 335 | <i>MPP2</i>      | 42.48% | 10.73% | -0.25 |            |
| 336 | <i>CSNK1A1</i>   | 42.47% | 13.54% | -0.25 |            |
| 337 | <i>PTK9</i>      | 42.42% | 11.31% | -0.26 |            |
| 338 | <i>STK25</i>     | 42.41% | 12.54% | -0.26 |            |
| 339 | <i>PFKL</i>      | 42.39% | 12.01% | -0.26 |            |
| 340 | <i>STK19</i>     | 42.35% | 11.20% | -0.27 |            |
| 341 | <i>PI4KII</i>    | 42.30% | 14.04% | -0.27 |            |
| 342 | <i>HK1</i>       | 42.26% | 12.73% | -0.28 |            |
| 343 | <i>AURKA</i>     | 42.21% | 14.80% | -0.29 |            |
| 344 | <i>GK5</i>       | 42.21% | 10.98% | -0.29 |            |
| 345 | <i>MAP3K7</i>    | 42.20% | 13.13% | -0.29 |            |
| 346 | <i>PFTK1</i>     | 42.18% | 12.49% | -0.29 |            |
| 347 | <i>ERN1</i>      | 42.17% | 13.74% | -0.29 |            |
| 348 | <i>STK33</i>     | 42.17% | 13.22% | -0.29 |            |



|     |           |        |        |       |  |
|-----|-----------|--------|--------|-------|--|
| 349 | SYK       | 42.13% | 12.42% | -0.30 |  |
| 350 | GALK2     | 42.13% | 11.34% | -0.30 |  |
| 351 | TSSK1     | 42.12% | 11.98% | -0.30 |  |
| 352 | MAPK6     | 42.11% | 10.58% | -0.30 |  |
| 353 | ASCIZ     | 42.07% | 10.61% | -0.30 |  |
| 354 | PFKP      | 42.07% | 14.99% | -0.31 |  |
| 355 | PXK       | 42.05% | 14.69% | -0.31 |  |
| 356 | PI4K2B    | 42.05% | 11.84% | -0.31 |  |
| 357 | PIP5K2C   | 42.02% | 9.50%  | -0.31 |  |
| 358 | PFKFB3    | 42.00% | 12.79% | -0.31 |  |
| 359 | TSSK3     | 41.97% | 14.82% | -0.32 |  |
| 360 | MPP6      | 41.97% | 12.68% | -0.32 |  |
| 361 | MPP4      | 41.87% | 12.27% | -0.33 |  |
| 362 | LOC653155 | 41.85% | 11.50% | -0.34 |  |
| 363 | ALPK1     | 41.82% | 12.37% | -0.34 |  |
| 364 | CDK9      | 41.76% | 10.32% | -0.35 |  |
| 365 | PDK3      | 41.66% | 10.87% | -0.36 |  |
| 366 | CKMT2     | 41.66% | 12.57% | -0.36 |  |
| 367 | CAMK1G    | 41.63% | 12.06% | -0.37 |  |
| 368 | MAPKAPK3  | 41.61% | 13.19% | -0.37 |  |
| 369 | PIK4CB    | 41.55% | 14.29% | -0.38 |  |
| 370 | PRPS1L1   | 41.54% | 11.08% | -0.38 |  |
| 371 | FASTK     | 41.49% | 12.56% | -0.39 |  |
| 372 | CAMK1D    | 41.49% | 11.54% | -0.39 |  |
| 373 | MARK2     | 41.48% | 14.28% | -0.39 |  |
| 374 | PDK4      | 41.43% | 13.43% | -0.39 |  |
| 375 | NEK7      | 41.36% | 9.57%  | -0.40 |  |
| 376 | MAPK4     | 41.34% | 10.83% | -0.41 |  |
| 377 | PIK4CA    | 41.32% | 11.99% | -0.41 |  |
| 378 | JAK1      | 41.31% | 11.56% | -0.41 |  |
| 379 | PDXK      | 41.30% | 11.93% | -0.41 |  |
| 380 | TGFBR2    | 41.25% | 15.85% | -0.42 |  |
| 381 | PHKB      | 41.25% | 10.81% | -0.42 |  |
| 382 | ULK2      | 41.24% | 15.35% | -0.42 |  |
| 383 | MKMK1     | 41.21% | 13.08% | -0.42 |  |
| 384 | CDC2L6    | 41.17% | 10.91% | -0.43 |  |
| 385 | CSNK1G3   | 41.13% | 10.53% | -0.44 |  |
| 386 | CAMK1     | 41.08% | 11.68% | -0.44 |  |
| 387 | DGKZ      | 41.07% | 12.69% | -0.44 |  |
| 388 | SGK       | 40.91% | 11.92% | -0.47 |  |
| 389 | TBK1      | 40.83% | 14.81% | -0.48 |  |
| 390 | ILK       | 40.81% | 12.62% | -0.48 |  |
| 391 | STK32B    | 40.80% | 11.79% | -0.48 |  |
| 392 | TXNDC3    | 40.78% | 12.24% | -0.48 |  |
| 393 | RPS6KB1   | 40.72% | 10.13% | -0.49 |  |
| 394 | ZAK       | 40.71% | 10.32% | -0.49 |  |
| 395 | DYRK4     | 40.66% | 12.59% | -0.50 |  |
| 396 | ITGB1BP3  | 40.57% | 11.99% | -0.51 |  |
| 397 | MPP1      | 40.53% | 10.94% | -0.52 |  |
| 398 | HIPK2     | 40.49% | 11.06% | -0.52 |  |
| 399 | MAPK13    | 40.46% | 12.06% | -0.53 |  |
| 400 | TK1       | 40.39% | 11.04% | -0.54 |  |
| 401 | SH3BP4    | 40.36% | 12.11% | -0.54 |  |
| 402 | CKM       | 40.29% | 12.70% | -0.55 |  |
| 403 | FGFRL1    | 40.23% | 16.94% | -0.56 |  |
| 404 | MAPK10    | 40.23% | 12.29% | -0.56 |  |
| 405 | CALM2     | 40.16% | 8.64%  | -0.57 |  |
| 406 | CALM3     | 40.12% | 11.85% | -0.58 |  |
| 407 | STYK1     | 40.09% | 11.47% | -0.58 |  |

|     |                  |        |        |       |  |
|-----|------------------|--------|--------|-------|--|
| 408 | <i>CDKL4</i>     | 40.08% | 11.01% | -0.58 |  |
| 409 | <i>NADK</i>      | 40.08% | 11.89% | -0.58 |  |
| 410 | <i>MPP7</i>      | 40.06% | 11.72% | -0.59 |  |
| 411 | <i>CAMKV</i>     | 40.03% | 12.16% | -0.59 |  |
| 412 | <i>EXOSC10</i>   | 40.02% | 12.78% | -0.59 |  |
| 413 | <i>CDKL5</i>     | 39.98% | 10.10% | -0.60 |  |
| 414 | <i>STK38</i>     | 39.90% | 9.61%  | -0.61 |  |
| 415 | <i>INSRR</i>     | 39.90% | 15.08% | -0.61 |  |
| 416 | <i>DCK</i>       | 39.86% | 10.23% | -0.61 |  |
| 417 | <i>TLK2</i>      | 39.80% | 14.66% | -0.62 |  |
| 418 | <i>PCTK3</i>     | 39.66% | 10.48% | -0.64 |  |
| 419 | <i>LOC388957</i> | 39.65% | 10.97% | -0.64 |  |
| 420 | <i>PAPSS1</i>    | 39.59% | 13.48% | -0.65 |  |
| 421 | <i>ACVR2B</i>    | 39.56% | 14.70% | -0.65 |  |
| 422 | <i>NME1-NME2</i> | 39.53% | 12.01% | -0.66 |  |
| 423 | <i>NEK10</i>     | 39.50% | 13.78% | -0.66 |  |
| 424 | <i>MAP3K11</i>   | 39.47% | 9.33%  | -0.67 |  |
| 425 | <i>PMVK</i>      | 39.46% | 10.19% | -0.67 |  |
| 426 | <i>MAPK9</i>     | 39.45% | 12.74% | -0.67 |  |
| 427 | <i>MKNK2</i>     | 39.39% | 13.54% | -0.68 |  |
| 428 | <i>GRK7</i>      | 39.34% | 14.98% | -0.68 |  |
| 429 | <i>RIOK2</i>     | 39.27% | 11.79% | -0.69 |  |
| 430 | <i>DGKK</i>      | 39.27% | 9.02%  | -0.69 |  |
| 431 | <i>ACVR1</i>     | 39.15% | 13.96% | -0.71 |  |
| 432 | <i>TLK1</i>      | 39.11% | 15.46% | -0.72 |  |
| 433 | <i>LATS1</i>     | 39.05% | 10.46% | -0.73 |  |
| 434 | <i>SCYL1</i>     | 39.01% | 11.41% | -0.73 |  |
| 435 | <i>TESK2</i>     | 38.93% | 13.30% | -0.74 |  |
| 436 | <i>DGUOK</i>     | 38.90% | 14.54% | -0.75 |  |
| 437 | <i>PGK1</i>      | 38.87% | 12.26% | -0.75 |  |
| 438 | <i>MAGI1</i>     | 38.87% | 12.66% | -0.75 |  |
| 439 | <i>SNRK</i>      | 38.79% | 11.61% | -0.76 |  |
| 440 | <i>CALM1</i>     | 38.65% | 10.26% | -0.78 |  |
| 441 | <i>RIOK1</i>     | 38.58% | 12.39% | -0.79 |  |
| 442 | <i>EEF2K</i>     | 38.56% | 11.96% | -0.79 |  |
| 443 | <i>MAPK8</i>     | 38.45% | 10.51% | -0.81 |  |
| 444 | <i>CSNK1D</i>    | 38.44% | 15.60% | -0.81 |  |
| 445 | <i>ULK4</i>      | 38.42% | 12.02% | -0.81 |  |
| 446 | <i>STK38L</i>    | 38.33% | 12.63% | -0.83 |  |
| 447 | <i>RIOK3</i>     | 38.21% | 12.80% | -0.84 |  |
| 448 | <i>MINK1</i>     | 38.00% | 14.94% | -0.87 |  |
| 449 | <i>ROR2</i>      | 37.95% | 15.32% | -0.88 |  |
| 450 | <i>PTK2</i>      | 37.93% | 10.59% | -0.88 |  |
| 451 | <i>PIK3R5</i>    | 37.84% | 13.17% | -0.89 |  |
| 452 | <i>ALDH18A1</i>  | 37.81% | 15.66% | -0.90 |  |
| 453 | <i>NYD-SP25</i>  | 37.79% | 13.52% | -0.90 |  |
| 454 | <i>MAP4K3</i>    | 37.76% | 9.58%  | -0.90 |  |
| 455 | <i>AGK</i>       | 37.61% | 13.89% | -0.92 |  |
| 456 | <i>GSK3A</i>     | 37.56% | 14.44% | -0.93 |  |
| 457 | <i>BMPR1A</i>    | 37.56% | 16.10% | -0.93 |  |
| 458 | <i>STK16</i>     | 37.53% | 11.09% | -0.94 |  |
| 459 | <i>FASTKD2</i>   | 37.50% | 8.53%  | -0.94 |  |
| 460 | <i>MAP4K4</i>    | 37.39% | 15.68% | -0.96 |  |
| 461 | <i>LRRK2</i>     | 37.38% | 10.11% | -0.96 |  |
| 462 | <i>TGFBR3</i>    | 37.33% | 11.04% | -0.96 |  |
| 463 | <i>PDGFRB</i>    | 37.29% | 16.90% | -0.97 |  |
| 464 | <i>DLG3</i>      | 37.09% | 12.08% | -1.00 |  |
| 465 | <i>PFKFB2</i>    | 36.99% | 10.37% | -1.01 |  |
| 466 | <i>AKT1</i>      | 36.66% | 13.43% | -1.06 |  |

|     |                      |                   |        |       |        |
|-----|----------------------|-------------------|--------|-------|--------|
| 467 | <i>PRKCI</i>         | 36.54%            | 11.44% | -1.07 |        |
| 468 | <i>NEK4</i>          | 36.50%            | 13.19% | -1.08 |        |
| 469 | <i>PRKD1</i>         | 36.45%            | 14.57% | -1.09 |        |
| 470 | <i>SRPK2</i>         | 36.37%            | 12.38% | -1.10 |        |
| 471 | <i>SH3BP5</i>        | 36.37%            | 17.17% | -1.10 |        |
| 472 | <i>CLK1</i>          | 36.06%            | 11.13% | -1.14 |        |
| 473 | <i>GK</i>            | 35.86%            | 17.33% | -1.17 |        |
| 474 | <i>IHPK1</i>         | 35.53%            | 12.15% | -1.21 |        |
| 475 | <i>IHPK3</i>         | 35.48%            | 9.30%  | -1.22 |        |
| 476 | <i>PLAU</i>          | 35.36%            | 13.10% | -1.24 |        |
| 477 | <i>TAOK3</i>         | 35.29%            | 14.78% | -1.25 |        |
| 478 | <i>PAK2</i>          | 35.20%            | 12.51% | -1.26 |        |
| 479 | <i>BMX</i>           | 35.12%            | 12.94% | -1.27 |        |
| 480 | <i>DAPK2</i>         | 35.01%            | 13.92% | -1.29 |        |
| 481 | <i>CSNK1E</i>        | 34.83%            | 15.21% | -1.31 |        |
| 482 | <i>MAPK3</i>         | 34.75%            | 19.93% | -1.32 | Lethal |
| 483 | <i>MAP3K15</i>       | 34.40%            | 16.76% | -1.37 | Lethal |
| 484 | <i>MPP5</i>          | 34.35%            | 11.80% | -1.38 |        |
| 485 | <i>MAST2</i>         | 34.08%            | 16.10% | -1.42 |        |
| 486 | <i>GRK6</i>          | 34.04%            | 15.82% | -1.42 |        |
| 487 | <i>DKFZp761P0423</i> | 33.93%            | 13.58% | -1.44 |        |
| 488 | <i>VRK1</i>          | 33.87%            | 9.28%  | -1.45 |        |
| 489 | <i>DCAMKL2</i>       | 33.77%            | 11.96% | -1.46 |        |
| 490 | <i>IHPK2</i>         | 33.75%            | 9.56%  | -1.46 |        |
| 491 | <i>MATK</i>          | 33.44%            | 10.25% | -1.51 |        |
| 492 | <i>RP2</i>           | 33.20%            | 13.41% | -1.54 |        |
| 493 | <i>MAP2K2</i>        | 32.98%            | 15.34% | -1.57 |        |
| 494 | <i>UCK2</i>          | 32.82%            | 13.75% | -1.59 |        |
| 495 | <i>NEK6</i>          | 32.74%            | 15.85% | -1.60 |        |
| 496 | <i>PRKG1</i>         | 32.52%            | 14.60% | -1.63 |        |
| 497 | <i>MAP3K12</i>       | 32.49%            | 15.33% | -1.64 |        |
| 498 | <i>PCTK1</i>         | 32.48%            | 13.21% | -1.64 |        |
| 499 | <i>MGC42105</i>      | 32.36%            | 13.85% | -1.66 |        |
| 500 | <i>MAP2K6</i>        | 32.32%            | 11.92% | -1.66 |        |
| 501 | <i>SH3BP5L</i>       | 32.11%            | 15.55% | -1.69 |        |
| 502 | <i>FES</i>           | 32.07%            | 11.04% | -1.70 |        |
| 503 | <i>RKHD3</i>         | 31.89%            | 12.45% | -1.72 |        |
| 504 | <i>PRKACA</i>        | 31.76%            | 18.45% | -1.74 | Lethal |
| 505 | <i>MAP4K1</i>        | 31.51%            | 13.69% | -1.77 |        |
| 506 | <i>CSNK1G1</i>       | 30.32%            | 14.90% | -1.94 |        |
| 507 | <i>MAPKAPK5</i>      | 30.15%            | 13.47% | -1.96 |        |
| 508 | <i>CSK</i>           | 29.83%            | 14.11% | -2.01 | Lethal |
| 509 | <i>BRD3</i>          | 29.16%            | 8.83%  | -2.10 |        |
| 510 | <i>ADRBK1</i>        | 29.00%            | 16.93% | -2.12 |        |
| 511 | <i>BRSK2</i>         | 28.64%            | 13.09% | -2.17 |        |
| 512 | <i>ADCK1</i>         | 28.30%            | 13.52% | -2.22 |        |
| 513 | <i>CSNK1G2</i>       | 26.81%            | 14.42% | -2.43 |        |
| 514 | <i>CKMT1A</i>        | 26.80%            | 12.42% | -2.43 |        |
| 515 | <i>TSSK2</i>         | 25.66%            | 13.30% | -2.59 | Lethal |
| 516 | <i>CD2</i>           | 25.01%            | 14.99% | -2.68 |        |
| 517 | <i>PIP5K1A</i>       | 24.76%            | 15.49% | -2.71 |        |
| 518 | <i>PHKG1</i>         | 23.31%            | 14.24% | -2.91 |        |
| 519 | <i>ABL2</i>          | Low pLX DNA yield |        |       |        |
| 520 | <i>ACVR2A</i>        | Low pLX DNA yield |        |       |        |
| 521 | <i>BLK</i>           | Low pLX DNA yield |        |       |        |
| 522 | <i>CDC2L1</i>        | Low pLX DNA yield |        |       |        |
| 523 | <i>EGFR</i>          | Low pLX DNA yield |        |       |        |
| 524 | <i>EPHA3</i>         | Low pLX DNA yield |        |       |        |
| 525 | <i>EPHB1</i>         | Low pLX DNA yield |        |       |        |

|     |                  |                   |        |
|-----|------------------|-------------------|--------|
| 526 | <i>ERBB4</i>     | Low pLX DNA yield |        |
| 527 | <i>FASTKD3</i>   | Low pLX DNA yield |        |
| 528 | <i>FGFR1</i>     | Low pLX DNA yield |        |
| 529 | <i>FLT3</i>      | Low pLX DNA yield |        |
| 530 | <i>FLT4</i>      | Low pLX DNA yield |        |
| 531 | <i>HIPK3</i>     | Low pLX DNA yield |        |
| 532 | <i>KSR</i>       | Low pLX DNA yield |        |
| 533 | <i>LYN</i>       | Low pLX DNA yield |        |
| 534 | <i>PANK4</i>     | Low pLX DNA yield |        |
| 535 | <i>PDGFRA</i>    | Low pLX DNA yield |        |
| 536 | <i>PLK4</i>      | Low pLX DNA yield |        |
| 537 | <i>RET</i>       | Low pLX DNA yield |        |
| 538 | <i>SGK3</i>      | Low pLX DNA yield |        |
| 539 | <i>SRC</i>       | Low pLX DNA yield |        |
| 540 | <i>TXK</i>       | Low pLX DNA yield |        |
| 541 | <i>BRD4</i>      | Inf. Effic. < 70% |        |
| 542 | <i>CAMKK2</i>    | Inf. Effic. < 70% |        |
| 543 | <i>CKS1B</i>     | Inf. Effic. < 70% |        |
| 544 | <i>CLK3</i>      | Inf. Effic. < 70% |        |
| 545 | <i>DAPK3</i>     | Inf. Effic. < 70% |        |
| 546 | <i>EPHA4</i>     | Inf. Effic. < 70% |        |
| 547 | <i>EPHB6</i>     | Inf. Effic. < 70% |        |
| 548 | <i>FGFR3</i>     | Inf. Effic. < 70% |        |
| 549 | <i>FRK</i>       | Inf. Effic. < 70% |        |
| 550 | <i>GCK</i>       | Inf. Effic. < 70% |        |
| 551 | <i>GNE</i>       | Inf. Effic. < 70% |        |
| 552 | <i>HIPK4</i>     | Inf. Effic. < 70% |        |
| 553 | <i>ITK</i>       | Inf. Effic. < 70% |        |
| 554 | <i>KDR</i>       | Inf. Effic. < 70% |        |
| 555 | <i>LOC389599</i> | Inf. Effic. < 70% |        |
| 556 | <i>LOC649288</i> | Inf. Effic. < 70% |        |
| 557 | <i>MAP3K2</i>    | Inf. Effic. < 70% |        |
| 558 | <i>NEK5</i>      | Inf. Effic. < 70% |        |
| 559 | <i>NTRK1</i>     | Inf. Effic. < 70% |        |
| 560 | <i>PAK1</i>      | Inf. Effic. < 70% |        |
| 561 | <i>PHKG2</i>     | Inf. Effic. < 70% |        |
| 562 | <i>PIK3CA</i>    | Inf. Effic. < 70% |        |
| 563 | <i>PIK3R3</i>    | Inf. Effic. < 70% |        |
| 564 | <i>PIP5K1B</i>   | Inf. Effic. < 70% |        |
| 565 | <i>RIPK1</i>     | Inf. Effic. < 70% |        |
| 566 | <i>RIPK2</i>     | Inf. Effic. < 70% |        |
| 567 | <i>RPS6KA2</i>   | Inf. Effic. < 70% |        |
| 568 | <i>RPS6KC1</i>   | Inf. Effic. < 70% |        |
| 569 | <i>STK17B</i>    | Inf. Effic. < 70% |        |
| 570 | <i>TGFBR1</i>    | Inf. Effic. < 70% |        |
| 571 | <i>UHMK1</i>     | Inf. Effic. < 70% |        |
| 572 | <i>XRCC6BP1</i>  | Inf. Effic. < 70% |        |
| 573 | <i>BCKDK</i>     | Replicate STDEV   |        |
| 574 | <i>C1orf57</i>   | Replicate STDEV   |        |
| 575 | <i>CAMKK1</i>    | Replicate STDEV   |        |
| 576 | <i>CDC2L2</i>    | Replicate STDEV   |        |
| 577 | <i>CDK5</i>      | Replicate STDEV   |        |
| 578 | <i>ERBB3</i>     | Replicate STDEV   |        |
| 579 | <i>GSG2</i>      | Replicate STDEV   |        |
| 580 | <i>LOC647279</i> | Replicate STDEV   |        |
| 581 | <i>LYK5</i>      | Replicate STDEV   |        |
| 582 | <i>MAPK1</i>     | Replicate STDEV   | Lethal |
| 583 | <i>MAP2K5</i>    | Replicate STDEV   |        |
| 584 | <i>MAP4K2</i>    | Replicate STDEV   |        |

|     |                |                 |        |
|-----|----------------|-----------------|--------|
| 585 | <i>NUAK2</i>   | Replicate STDEV |        |
| 586 | <i>PDK2</i>    | Replicate STDEV | Lethal |
| 587 | <i>PFKM</i>    | Replicate STDEV |        |
| 588 | <i>PIK3R1</i>  | Replicate STDEV |        |
| 589 | <i>PLK2</i>    | Replicate STDEV |        |
| 590 | <i>PRKAR2A</i> | Replicate STDEV |        |
| 591 | <i>RPS6KA3</i> | Replicate STDEV |        |
| 592 | <i>RPS6KA6</i> | Replicate STDEV |        |
| 593 | <i>SGK2</i>    | Replicate STDEV |        |
| 594 | <i>SRPK3</i>   | Replicate STDEV |        |
| 595 | <i>VRK1</i>    | Replicate STDEV |        |
| 596 | <i>VRK2</i>    | Replicate STDEV |        |
| 597 | <i>VRK3</i>    | Replicate STDEV |        |

**Supplementary Table 3:** Results of a secondary screen quantifying the change in PLX4720 GI<sub>50</sub> induced by the top 9 candidate resistance ORFs

| Secondary Screen |                                |                                    |      |               |                                |                                    |      |
|------------------|--------------------------------|------------------------------------|------|---------------|--------------------------------|------------------------------------|------|
| A375             |                                |                                    |      | SKMEL28       |                                |                                    |      |
| Gene             | GI <sub>50</sub><br>( $\mu$ M) | Fold<br>Change<br>GI <sub>50</sub> | Rank | Gene          | GI <sub>50</sub><br>( $\mu$ M) | Fold<br>Change<br>GI <sub>50</sub> | Rank |
| <i>MAP3K8</i>    | >100.0                         | 598                                | 1    | <i>MAP3K8</i> | >100.0                         | ~100                               | 1    |
| <i>RAF1</i>      | $\geq$ 100.0                   | 598                                | 2    | <i>RAF1</i>   | $\geq$ 10.0                    | $\geq$ 10                          | 2    |
| <i>CRKL</i>      | >10.0                          | 59.8                               | 3    | <i>CRKL</i>   | 9.7                            | 9.7                                | 3    |
| <i>FGR</i>       | >10.0                          | 59.8                               | 4    | <i>FGR</i>    | 5                              | 5                                  | 4    |
| <i>PRKCE</i>     | 4.41                           | 26.4                               | 5    | <i>PRKCH</i>  | 2.26                           | 2.26                               | 5    |
| <i>PRKCH</i>     | 4.14                           | 24.7                               | 6    | <i>PRKCE</i>  | 1.91                           | 1.91                               | 6    |
| <i>ERBB2</i>     | 1.33                           | 7.95                               | 7    | <i>AXL</i>    | 1.18                           | 1.18                               | 7    |
| <i>AXL</i>       | 1                              | 5.98                               | 8    | <i>ERBB2</i>  | 1                              | 1                                  | 8    |
| <i>PAK3</i>      | 0.4934                         | 2.95                               | 9    | <i>PAK3</i>   | 0.9041                         | 0.9041                             | 9    |
| Controls         |                                |                                    |      | Controls      |                                |                                    |      |
| <i>Mock</i>      | 0.1528                         | 0.91                               |      | <i>Mock</i>   | 0.5287                         | 1.89                               |      |
| <i>MEK1</i>      | 0.1671                         | 1                                  | (-)  | <i>MEK1</i>   | 1                              | 1                                  | (-)  |
| <i>MEK DD</i>    | 4.8                            | 28                                 | (+)  | <i>MEK DD</i> | 8.29                           | 8.29                               | (+)  |

**Supplementary Table 4: Patient characteristics**

| Patient | Tissue             | Age (years) | Gender | Biopsy Location     | Time from primary diagnosis (years) | Time from metastatic disease diagnosis (years) | Response         | <i>BRAF</i> status (pre-treatment) | <i>BRAF</i> status (on-treatment/post-relapse) | <i>NRAS</i> status | <i>KRAS</i> status | pMEK status | pERK status |
|---------|--------------------|-------------|--------|---------------------|-------------------------------------|------------------------------------------------|------------------|------------------------------------|------------------------------------------------|--------------------|--------------------|-------------|-------------|
| Pt 1    | Tissue Biopsy      | 49          | F      | Back                | 5                                   | 3                                              | Partial Response | V600E                              | N/A                                            | N/A                | N/A                | N/A         | N/A         |
| Pt 2    | Tissue Biopsy      | 67          | M      | Back                | 2                                   | 0                                              | Partial Response | V600E                              | N/A                                            | N/A                | N/A                | N/A         | N/A         |
| Pt 3    | Tissue Biopsy      | 68          | M      | Leg                 | 11                                  | 0                                              | Partial Response | V600E                              | N/A                                            | N/A                | N/A                | N/A         | N/A         |
| MM-R    | Tissue Biopsy      | 38          | M      | Axilla              | 0                                   | 0                                              | Partial Response | V600E                              | V600E                                          | WT                 | WT                 | *           | *           |
| M307    | Short-term Culture | 59          | M      | Axillary Lymph node | 4                                   | 4                                              | Stable Disease   | V600E                              | V600E                                          | N/A                | N/A                | Ref. (14)   | **          |

\* See Supplementary Figure 16

\*\* See Main Figure 3f
